# Supplementary material for: Electrochemical valorization of HCl for the production of chlorine via a proton-filter functional covalent organic framework
Source: Royal Society of Chemistry journal article supplement (doi:10.1039/d3ta06948f), 2024-01-01
Supplement: d3ta06948f1.pdf [file d3ta06948f1.pdf]

## Supporting information

### **Electrochemical valorization of HCl for the production of chlorine *via* proton-filter functional covalent organic framework**

Sukhjot Kaur,<sup>a#</sup> Kayaramkodath C. Ranjeesh,<sup>b#</sup> Kalpana Garg,<sup>a#</sup> Safa Gaber,<sup>b</sup> Shivangi Mehta,<sup>a</sup> Tharamani C. Nagaiah,<sup>a\*</sup> Dinesh Shetty<sup>b,c\*</sup>

<sup>a</sup>Department of Chemistry, Indian Institute of Technology Ropar, Rupnagar, Punjab-140001, India

Email: [tharamani@iitrpr.ac.in](mailto:tharamani@iitrpr.ac.in)

<sup>b</sup>Department of Chemistry, Khalifa University Science & Technology, Abu Dhabi, United Arab Emirates

<sup>c</sup>Advanced Materials Chemistry Center (AMCC), Khalifa University Science & Technology, Abu Dhabi, United Arab Emirates.

E-mail: [dinesh.shetty@ku.ac.ae](mailto:dinesh.shetty@ku.ac.ae)

## Chemicals required

4, 4',4''-(1,3,5-triazine-2,4,6-triyl)trianiline (Tta, TCI Chemicals), 2,6-diformylpyridine (Dfp, TCI Chemicals) 1,3,5-tris(4-aminophenyl)benzene (Tab, TCI Chemicals), 1, 4-dioxane (Sigma-Aldrich), mesitylene (Sigma-Aldrich), acetic acid (Merck), N, N-dimethylacetamide (DMA) (Sigma-Aldrich), acetone (Merck), methanol (Fisher Scientific), were used as received. All the reactions were carried out in oven-dried 35 ml heavy walled (HW) pressure glass vessel capped with Teflon screw cap with rubber internal thread under an air atmosphere unless otherwise mentioned. Rh<sub>x</sub>S<sub>y</sub>/C (30%) was obtained from De Nora; RuO<sub>2</sub> was obtained from Sigma-Aldrich

## Physical characterization

For the preliminary analysis of the synthesized COFs, powder X-ray diffraction (P-XRD) measurements were performed on Rigaku Smart Lab II with Cu K $\alpha$  ( $\lambda = 1.5405 \text{ \AA}$ ) radiation source operating at 40 kV and 40 mA. The patterns were recorded with divergent slit of 1/16° over the 2 $\theta$  range of 2–50° with step size = 0.02°. Fourier transform infrared (FT-IR) spectra were taken on a Bruker Optics ALPHA-E spectrometer with a universal Zn-Se ATR (attenuated total reflection) accessory in the 600– 4000 cm<sup>-1</sup> region or using a Diamond ATR (Golden Gate) with 24 scan rate and 4 cm<sup>-1</sup> resolution. Solid-state <sup>13</sup>C cross polarization-magic angle spinning (CP/MAS) NMR spectra of the COFs were recorded on a Bruker Avance 500 Wide Bore (500MHz) spectrometer at ambient temperature with a magic angle spinning rate of 18.0 kHz and the data were processed using Top Spin software. The BET and porosity analyses were performed on an Anton Paar Autosorb iQ combined physisorption and chemisorption instrument. For each measurement, 20 – 30 mg of COF samples were used and were activated at 80 °C for 16 hours in N<sub>2</sub> gas and utilised liquid N<sub>2</sub> bath (77 K) to collect full isotherms. Further, the surface areas were calculated using the multipoint Brunauer-Emmett-Teller (BET) model, and pore size distributions were evaluated/calculated using the non-local density functional theory (NLDFT). TGA analysis was performed using a PerkinElmer Simultaneous Thermal analyzer STA 6000 under N<sub>2</sub> environment at a heating rate of 15 °C min<sup>-1</sup> and a temperature range of 30-900 °C.<sup>1</sup>

The morphological and elemental analyses was done by scanning electron microscopy (SEM, JEOL JSM-7610F FEG-SEM). The samples for SEM analyses were prepared by drop-casting 10  $\mu$ L of material slurry on a silicon substrate (slurry prepared by dispersing it in isopropyl alcohol) and drying in air followed by Pt coating (nano-sized film) using the JEOL JEC-300FC Auto Fine instrument. Further, transmission electron microscopy (TEM) and high-resolution TEM (HR-TEM) were employed for the in-depth morphological analysis by FEI Tecnai TEM 20 kV. The TEM samples were prepared by drop casting the material slurry over carbon grids (TED PELLA, INC. 200 mesh) and then drying overnight in desiccators. X-ray photoelectron spectroscopy XPS measurements were performed using a Supra+ instrument (Kratos, Manchester, UK) equipped with an Al K $\alpha$  excitation source and a monochromator. The charge neutralizer was on during the measurements. The take-off angle was 90°. XPS measurements and data processing were performed using ESCApe 1.5 software (Kratos). The powder

samples were placed on a carbon tape attached to the silicon wafer. The area analysed was 300 by 700 microns. The measurements were performed at a pass energy of 20 eV. The base pressure in the main analysis chamber was  $8 \times 10^{-8}$  mbar. The binding energy scale was corrected based on the C-C/C-H peak at 284.8 eV in the C 1s spectrum.

### Electrochemical investigation

The synthesized catalyst was meticulously homogenized in a mortar and pestle and 3.00 mg of it was added to 50  $\mu$ l IPA followed by the addition of 945  $\mu$ l of DI water and 5  $\mu$ l of 0.25% Nafion solution. The mixture was ultrasonicated for an hour to obtain a uniform catalyst slurry. The carbon paper was cleansed in 5 M HNO<sub>3</sub> to get rid of surface oxides before analysis, then it was ultrasonically processed for 15 minutes in water, followed by another 15 minutes in isopropyl alcohol (IPA). Following that, the 40  $\mu$ l of catalytic ink was drop-casted on carbon paper and left to dry at room temperature. The electrochemical measurements were performed using Biologic VSP-300 potentiostat/galvanostat connected with EC-Lab software. The measurements were carried out using three-electrode assembly, which comprised of Ag/AgCl/3M KCl as reference electrode and graphite electrode was employed as counter electrode. The working electrode was prepared by drop-casting 20  $\mu$ L of catalyst slurry followed by drying at room temperature.

The electrocatalytic activity w.r.t oxygen reduction reactions were analysed by linear sweep voltammetric (LSV) experiments were performed in O<sub>2</sub> and Ar saturated 0.4 M HCl at a scan rate of 10 mV s<sup>-1</sup> across a potential range of 0.5 to -0.1 V vs. RHE. The hydrodynamic experiments viz, rotating disk electrode (RDE) using a glassy carbon disk electrode from Pine and experiments were performed using a speed controlling unit (AFMSRCE, Pine Research Instrument Inc., USA) at various rotation rate in the range of 100 to 1300 rpm. All the potential are converted to the RHE scale for uniformity unless detailed otherwise.

$$E_{RHE} = E_{Ag/AgCl} + E_{Ag/AgCl}^{\circ} + 0.059 pH$$

The current density is calculated using the equation:

$$j = i/A$$

where *i* is the current in mA and *A* is the size of the electrode in cm<sup>2</sup>.

Where  $E_{RHE}$  is the converted potential vs. RHE,  $E_{Ag/AgCl}$  is the experimentally measured potential vs. Ag/AgCl (saturated KCl), and  $E_{Ag/AgCl}^{\circ}$  is 0.1976 V at 25 °C.

### Rotating disk electrode (RDE) analysis

The RDE measurements were performed for each variants by sweeping the potential from 0.5 V to -0.1 V in the oxygen saturated 0.4 M HCl solution at different rotation rates ranging from 0 to 1300 rpm. The measurements were recorded in Autolab 302 N modular potentiostat/galvanostat connected with Nova 1.11 software.

The mentioned K-L plots were extracted from RDE polarization curves using the following equation:

$$1/j = 1/j_k + 1/j_d$$

Where, 'j' stands for the measured current density, 'j<sub>k</sub>' and 'j<sub>d</sub>' represent kinetic and diffusion current densities, respectively. Furthermore, the slope of the K-L plot was computed by linearly fitting the graph between the inverse of the current density measured (y-axis) and inverse of square root of rotation rate (x-axis) to obtain the number of electrons transferred during the reaction. For calculating the kinetic parameters, the following equation was utilized;

$$j_d = 0.62nFD^{2/3}\nu^{-1/6}D_{O_2}$$

Here, n depicts the number of electrons transferred during the ORR, F is the Faraday constant (96500 C mol<sup>-1</sup>), D is the diffusion coefficient of dissolved oxygen (1.43\*10<sup>-5</sup> cm<sup>2</sup> s<sup>-1</sup>),  $\nu$  is the kinematic viscosity (1.13\*10<sup>-2</sup> cm<sup>2</sup> s<sup>-1</sup>) and D<sub>O<sub>2</sub></sub> represents the concentration of dissolved oxygen (1.61 mol cm<sup>-3</sup>) in 0.4 M HCl.

### Electrochemical impedance spectroscopy (EIS)

EIS measurements were performed at 1.6 V vs. RHE under illumination over a frequency range from 7 MHz to 10 Hz. Further, to obtain charge transfer resistance (R<sub>ct</sub>) the EIS curves were z fit using an appropriate equivalent circuit. Furthermore, the rate constant, k<sup>0</sup> was calculated from R<sub>ct</sub> by using the formulae:

$$k^0 = \frac{RT}{n^2 F^2 A C R_{ct}}$$

Where R is gas constant, T is temperature in Kelvin, n is the no. of electrons involved in the reaction, F is the faraday constant, A is the area of the electrode, C is the concentration of the reacting species and R<sub>ct</sub> is the charge transfer resistance.

### Electrochemical surface area (ECSA)

The ECSA was estimated by electrochemical double-layer capacitance (C<sub>dl</sub>) via CV plots obtained at different scan rates ranging from 20-300 mV s<sup>-1</sup>, with a sweep potential ranging from 0.63 to 0.75 V vs. RHE. The C<sub>dl</sub> can be calculated from the slope (k) of the current density against scan rate at 0.7 V vs. RHE.

Further, the ECSA was estimated according to the equation:

$$ECSA = \frac{C_{dl}}{C_s}$$

where  $C_s$  is a specific capacitance of  $40 \mu\text{F cm}^{-2}$

Additionally, specific surface area (SSA) has been calculated using the equation:

$$SSA = \frac{ECSA}{\text{loading of the catalyst}}$$

### Scanning electrochemical microscopy (SECM) studies

The scanning electrochemical microscopic (SECM) approach was used to gain insight into the local electrocatalytic activity and distribution of active sites over the catalyst spot. Sensolytics Base SECM (Sensolytics, Bochum, Germany) with stepper-motor-driven x-y-z stages and an additional three-axis piezo-positioning system working in conjunction with the bi-potentiostat (Autolab 204, Metrohm) was utilized to record SECM analysis. To perform the SECM measurements, four electrodes assembly was used including Pt- micro-electrode (WE2) having diameter of  $25 \mu\text{m}$ , Ag/AgCl/3M KCl as reference, Pt-coil as counter and glassy carbon plate containing catalyst spot as a working electrode (WE1) respectively in oxygen saturated 0.4 M HCl solution. The electrocatalytic ability of each spot vs. Pt-microelectrode towards oxygen reduction in 0.4 M HCl solution was measured using the redox competitive mode of SECM. The GC (WE1) electrode was polarized at different potentials (0.5, 0.2, 0.0 and -0.1 V) whereas, Pt- micro-electrode (WE2) was constantly polarized at 0.2 V vs. RHE. The array scan was performed in x-y using tilt-control mode and the data was analyzed using Gwyddion and Origin 8.5 software. Moreover, two distinct pulse potential profile was also employed in order to see the stability and durability of the catalysts.

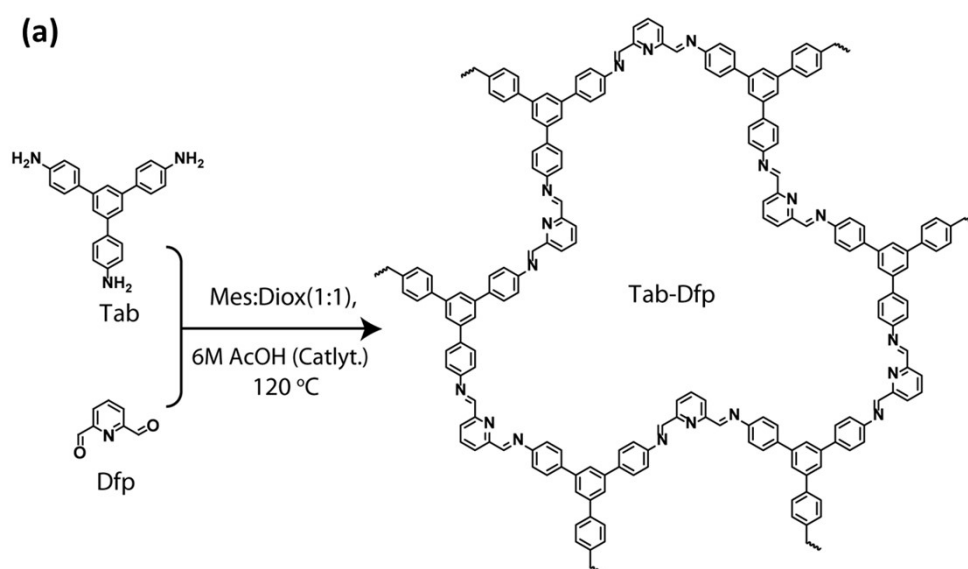

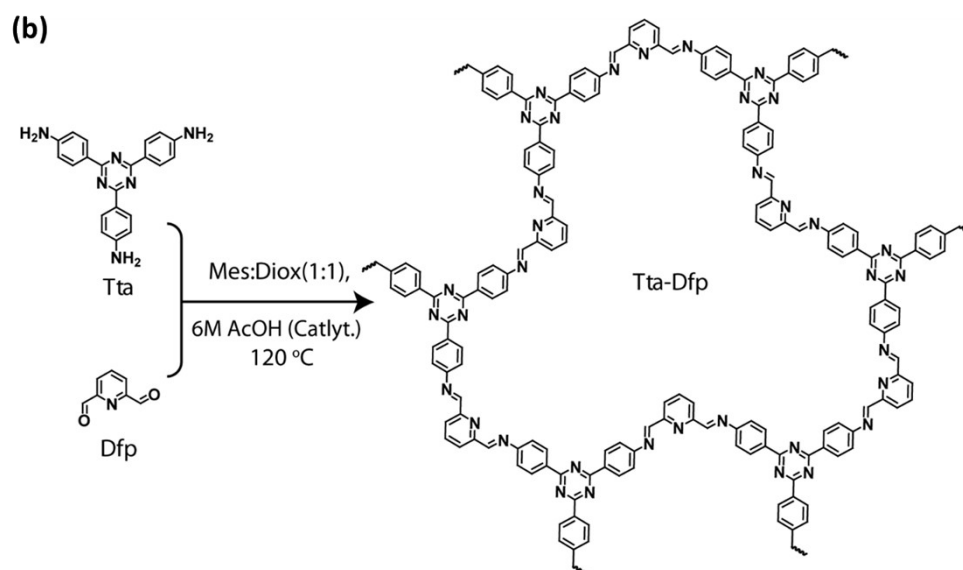

**Fig. S1** Synthetic scheme of (a) **Tab-Dfp** and (b) **Tta-Dfp**.<sup>1</sup>

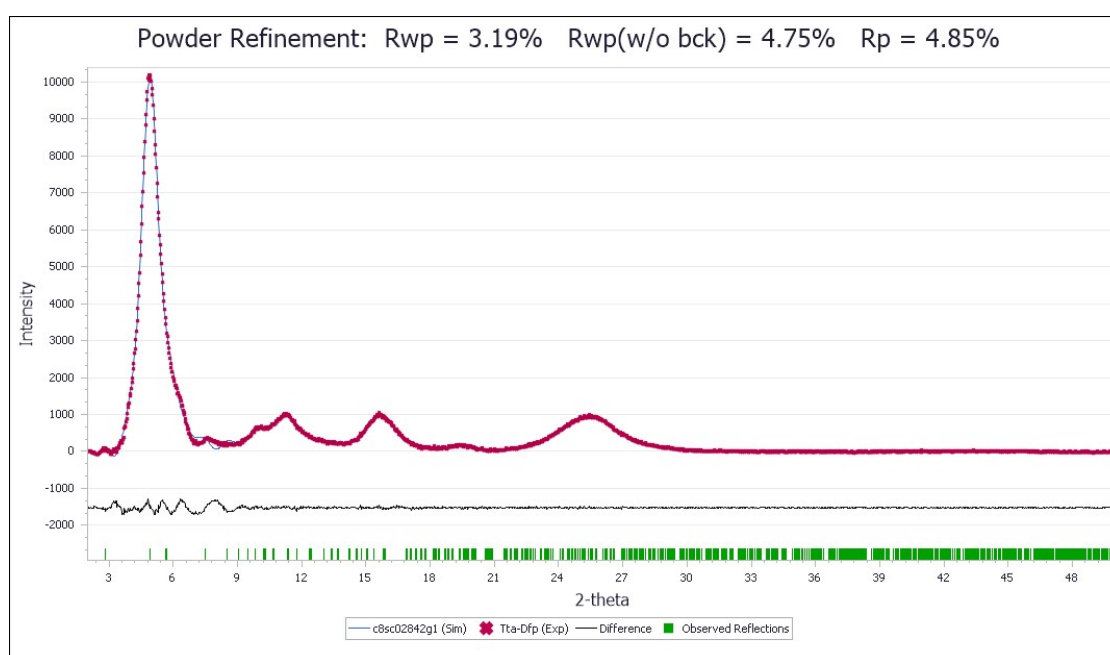

**Fig. S2** Comparison of experimental P-XRD pattern of **Tta-Dfp** (-); with corresponding simulated, and Pawley refined difference; Background; inset shows  $R_p$ ,  $R_{wp}$ , and  $R_{wp}(w/o\ bck)$  (lattice parameters: R, weighted profile R values:  $R_{wp}$ , Un-weighted profile R values  $R_p$ ).

**Table S1.** Fractional atomic coordinates of unit cell and lattice parameters of **Tta-Dfp**.

| <b>Tta-Dfp (Space group P3)</b>                                         |          |          |          |              |          |          |          |              |          |          |          |
|-------------------------------------------------------------------------|----------|----------|----------|--------------|----------|----------|----------|--------------|----------|----------|----------|
| <b>Unit cell parameters</b>                                             |          |          |          |              |          |          |          |              |          |          |          |
| <b>a = 35.92 Å, b = 35.92 Å, c = 9.75 Å; α = 90°, β = 90°, γ = 120°</b> |          |          |          |              |          |          |          |              |          |          |          |
| <b>Atoms</b>                                                            | <b>x</b> | <b>y</b> | <b>z</b> | <b>Atoms</b> | <b>x</b> | <b>y</b> | <b>z</b> | <b>Atoms</b> | <b>x</b> | <b>y</b> | <b>z</b> |
| H1                                                                      | -0.87009 | -1.07606 | -0.03212 | C15          | -2.86932 | -1.95742 | -0.03478 | C45          | -0.61776 | -1.95232 | 0.63011  |
| H2                                                                      | -0.94418 | -1.07672 | -0.03172 | C16          | -2.82751 | -1.95827 | -0.03486 | N46          | -0.60947 | -1.98885 | 0.63271  |
| H3                                                                      | -0.86773 | -0.92391 | -0.03489 | C17          | -2.82686 | -2.00033 | -0.03397 | C47          | -0.64499 | -2.03419 | 0.63486  |
| H4                                                                      | -0.79484 | -0.92546 | -0.03504 | C18          | -2.77232 | -2.03094 | -0.03072 | C48          | -0.63438 | -2.07263 | 0.63705  |
| H5                                                                      | -0.7996  | -1.06711 | -0.02731 | N19          | -2.71311 | -2.05533 | -0.03125 | C49          | -0.70808 | -2.24283 | 0.63533  |
| H6                                                                      | -0.6216  | -1.07592 | -0.04197 | C20          | -2.72317 | -2.01999 | -0.03202 | C50          | -0.70775 | -2.20043 | 0.63383  |
| H7                                                                      | -0.75044 | -1.28719 | -0.03984 | C21          | -2.68642 | -1.97343 | -0.03434 | C51          | -0.66575 | -2.1579  | 0.63909  |
| H8                                                                      | -0.75791 | -1.21712 | -0.04041 | C22          | -2.64043 | -1.96401 | -0.03613 | C52          | -0.62349 | -2.15838 | 0.6468   |
| H9                                                                      | -0.60815 | -1.1316  | -0.00588 | C23          | -2.63112 | -2.00065 | -0.03583 | C53          | -0.62377 | -2.20093 | 0.64821  |
| H10                                                                     | -0.60075 | -1.20048 | -0.00748 | C24          | -2.66821 | -2.04682 | -0.03313 | C54          | -0.6661  | -2.24371 | 0.64221  |
| C11                                                                     | -0.95693 | -0.99844 | -0.03369 | C25          | -2.65777 | -2.08524 | -0.03348 | C55          | -0.66671 | -2.28897 | 0.64316  |
| C12                                                                     | -0.86933 | -1.04304 | -0.0331  | C26          | -2.71915 | -2.25334 | -0.03246 | N56          | -0.37786 | -1.67016 | 0.62749  |
| C13                                                                     | -0.91188 | -1.0436  | -0.03306 | C27          | -2.72353 | -2.21334 | -0.0329  | N57          | -0.66833 | -2.11576 | 0.6372   |
| C14                                                                     | -0.91237 | -0.99902 | -0.034   | C28          | -2.68407 | -2.16871 | -0.02488 | N58          | -0.62611 | -2.28996 | 0.64318  |
| C15                                                                     | -0.86932 | -0.95742 | -0.03478 | C29          | -2.63974 | -2.1649  | -0.01479 | H59          | -0.53273 | -1.80838 | 0.66862  |
| C16                                                                     | -0.82751 | -0.95827 | -0.03486 | C30          | -2.63535 | -2.20481 | -0.01481 | H60          | -0.46416 | -1.73173 | 0.66373  |
| C17                                                                     | -0.82686 | -1.00033 | -0.03397 | C31          | -2.67493 | -2.24954 | -0.02371 | H61          | -0.37789 | -1.79335 | 0.59316  |
| C18                                                                     | -0.77232 | -1.03094 | -0.03072 | C32          | -2.66994 | -2.29181 | -0.02389 | H62          | -0.44769 | -1.87115 | 0.5951   |
| N19                                                                     | -0.71311 | -1.05533 | -0.03125 | N33          | -2.99841 | -2.03912 | -0.03364 | H63          | -0.58842 | -1.87658 | 0.61819  |
| C20                                                                     | -0.72317 | -1.01999 | -0.03202 | N34          | -2.78191 | -1.99728 | -0.0339  | C74          | -0.37331 | -1.70883 | 0.62752  |
| C21                                                                     | -0.68642 | -0.97343 | -0.03434 | N35          | -2.69067 | -2.1287  | -0.02607 | C75          | -0.49961 | -1.80619 | 0.64973  |
| C22                                                                     | -0.64043 | -0.96401 | -0.03613 | N36          | -2.62685 | -2.28755 | -0.02395 | C76          | -0.4599  | -1.76176 | 0.6481   |
| C23                                                                     | -0.63112 | -1.00065 | -0.03583 | H109         | -2.69308 | -1.94454 | -0.03469 | C77          | -0.41539 | -1.75619 | 0.62814  |
| C24                                                                     | -0.66821 | -1.04682 | -0.03313 | H110         | -2.61196 | -1.92828 | -0.038   | C78          | -0.4116  | -1.7963  | 0.60936  |
| C25                                                                     | -0.65777 | -1.08524 | -0.03348 | H111         | -2.59524 | -1.99301 | -0.0376  | C79          | -0.45143 | -1.84081 | 0.61021  |
| C26                                                                     | -0.71915 | -1.25334 | -0.03246 | H1           | -1.92394 | -1.79403 | -0.03212 | C80          | -0.49586 | -1.84637 | 0.6296   |
| C27                                                                     | -0.72353 | -1.21334 | -0.0329  | H2           | -1.92328 | -1.86746 | -0.03172 | C81          | -0.57921 | -1.90353 | 0.62681  |
| C28                                                                     | -0.68407 | -1.16871 | -0.02488 | H3           | -2.07609 | -1.94382 | -0.03489 | N104         | -0.53573 | -1.89305 | 0.63087  |
| C29                                                                     | -0.63974 | -1.1649  | -0.01479 | H4           | -2.07454 | -1.86938 | -0.03504 | H112         | -0.72051 | -2.07917 | 0.637    |
| C30                                                                     | -0.63535 | -1.20481 | -0.01481 | H5           | -1.93289 | -1.73249 | -0.02731 | H113         | -0.73632 | -2.01406 | 0.63222  |
| C31                                                                     | -0.67493 | -1.24954 | -0.02371 | H6           | -1.92408 | -1.54568 | -0.04197 | H114         | -0.6713  | -1.93278 | 0.62726  |
| C32                                                                     | -0.66994 | -1.29181 | -0.02389 | H7           | -1.71281 | -1.46325 | -0.03984 | N56          | -0.37786 | -2.67016 | 0.62749  |
| N33                                                                     | -0.99841 | -1.03912 | -0.03364 | H8           | -1.78288 | -1.54079 | -0.04041 | N56          | 0.62214  | -1.67016 | 0.62749  |
| N34                                                                     | -0.78191 | -0.99728 | -0.0339  | H9           | -1.8684  | -1.47655 | -0.00588 | N56          | 0.67016  | -0.7077  | 0.62749  |
| N35                                                                     | -0.69067 | -1.1287  | -0.02607 | H10          | -1.79952 | -1.40027 | -0.00748 | N56          | -1.2923  | -2.62214 | 0.62749  |
| N36                                                                     | -0.62685 | -1.28755 | -0.02395 | C11          | -2.00156 | -1.95849 | -0.03369 | N56          | -0.2923  | -1.62214 | 0.62749  |
| H109                                                                    | -0.69308 | -0.94454 | -0.03469 | C12          | -1.95696 | -1.82629 | -0.0331  | C74          | -1.37331 | -2.70883 | 0.62752  |
| H110                                                                    | -0.61196 | -0.92828 | -0.038   | C13          | -1.9564  | -1.86828 | -0.03306 | C74          | -0.29117 | -2.66448 | 0.62752  |
| H111                                                                    | -0.59524 | -0.99301 | -0.0376  | C14          | -2.00098 | -1.91335 | -0.034   | C74          | 0.70883  | -1.66448 | 0.62752  |
| H1                                                                      | -0.92394 | -1.79403 | -0.03212 | C15          | -2.04258 | -1.9119  | -0.03478 | C74          | -0.33552 | -1.62669 | 0.62752  |
| H2                                                                      | -0.92328 | -1.86746 | -0.03172 | C16          | -2.04173 | -1.86924 | -0.03486 | C74          | 0.66448  | -0.62669 | 0.62752  |
| H3                                                                      | -1.07609 | -1.94382 | -0.03489 | C17          | -1.99967 | -1.82653 | -0.03397 | H64          | -1.79169 | -0.92087 | 0.29904  |
| H4                                                                      | -1.07454 | -1.86938 | -0.03504 | C18          | -1.96906 | -1.74138 | -0.03072 | H65          | -1.86551 | -0.9213  | 0.2993   |
| H5                                                                      | -0.93289 | -1.73249 | -0.02731 | N19          | -1.94467 | -1.65778 | -0.03125 | H66          | -1.94028 | -1.07214 | 0.30235  |
| H6                                                                      | -0.92408 | -1.54568 | -0.04197 | C20          | -1.98001 | -1.70318 | -0.03202 | H67          | -1.86607 | -1.0714  | 0.30203  |
| H7                                                                      | -0.71281 | -1.46325 | -0.03984 | C21          | -2.02657 | -1.71299 | -0.03434 | H68          | -1.72941 | -0.92907 | 0.29529  |
| H8                                                                      | -0.78288 | -1.54079 | -0.04041 | C22          | -2.03599 | -1.67642 | -0.03613 | H69          | -1.54183 | -0.91917 | 0.30756  |
| H9                                                                      | -0.8684  | -1.47655 | -0.00588 | C23          | -1.99935 | -1.63047 | -0.03583 | H70          | -1.45865 | -0.70855 | 0.33337  |
| H10                                                                     | -0.79952 | -1.40027 | -0.00748 | C24          | -1.95318 | -1.62139 | -0.03313 | H71          | -1.53643 | -0.77838 | 0.33228  |
| C11                                                                     | -1.00156 | -1.95849 | -0.03369 | C25          | -1.91476 | -1.57253 | -0.03348 | H72          | -1.47361 | -0.86339 | 0.2587   |
| C12                                                                     | -0.95696 | -1.82629 | -0.0331  | C26          | -1.74666 | -1.46581 | -0.03246 | H73          | -1.39701 | -0.79478 | 0.2627   |
| C13                                                                     | -0.9564  | -1.86828 | -0.03306 | C27          | -1.78666 | -1.51019 | -0.0329  | C82          | -1.95428 | -0.99733 | 0.30123  |
| C14                                                                     | -1.00098 | -1.91335 | -0.034   | C28          | -1.83129 | -1.51536 | -0.02488 | C83          | -1.82369 | -0.95413 | 0.3002   |
| C15                                                                     | -1.04258 | -1.9119  | -0.03478 | C29          | -1.8351  | -1.47484 | -0.01479 | C84          | -1.86622 | -0.95437 | 0.30043  |
| C16                                                                     | -1.04173 | -1.86924 | -0.03486 | C30          | -1.79519 | -1.43054 | -0.01481 | C85          | -1.90902 | -0.99676 | 0.30142  |
| C17                                                                     | -0.99967 | -1.82653 | -0.03397 | C31          | -1.75046 | -1.42539 | -0.02371 | C86          | -1.90817 | -1.03883 | 0.30215  |
| C18                                                                     | -0.96906 | -1.74138 | -0.03072 | C32          | -1.70819 | -1.37813 | -0.02389 | C87          | -1.86579 | -1.03852 | 0.30198  |
| N19                                                                     | -0.94467 | -1.65778 | -0.03125 | N33          | -1.96088 | -1.95929 | -0.03364 | C88          | -1.82324 | -0.99646 | 0.30093  |

|             |          |          |          |             |          |          |          |             |          |          |         |
|-------------|----------|----------|----------|-------------|----------|----------|----------|-------------|----------|----------|---------|
| <b>C20</b>  | -0.98001 | -1.70318 | -0.03202 | <b>N34</b>  | -2.00272 | -1.78463 | -0.0339  | <b>C89</b>  | -1.73797 | -0.96515 | 0.29759 |
| <b>C21</b>  | -1.02657 | -1.71299 | -0.03434 | <b>N35</b>  | -1.8713  | -1.56197 | -0.02607 | <b>N90</b>  | -1.65416 | -0.94021 | 0.29802 |
| <b>C22</b>  | -1.03599 | -1.67642 | -0.03613 | <b>N36</b>  | -1.71245 | -1.3393  | -0.02395 | <b>C91</b>  | -1.69951 | -0.97575 | 0.29803 |
| <b>C23</b>  | -0.99935 | -1.63047 | -0.03583 | <b>H109</b> | -2.05546 | -1.74854 | -0.03469 | <b>C92</b>  | -1.70903 | -1.02222 | 0.29887 |
| <b>C24</b>  | -0.95318 | -1.62139 | -0.03313 | <b>H110</b> | -2.07172 | -1.68368 | -0.038   | <b>C93</b>  | -1.67229 | -1.03138 | 0.29994 |
| <b>C25</b>  | -0.91476 | -1.57253 | -0.03348 | <b>H111</b> | -2.00699 | -1.60223 | -0.0376  | <b>C94</b>  | -1.62644 | -0.99458 | 0.30033 |
| <b>C26</b>  | -0.74666 | -1.46581 | -0.03246 | <b>C11</b>  | -1.95693 | -1.99844 | -0.03369 | <b>C95</b>  | -1.61761 | -0.94848 | 0.29916 |
| <b>C27</b>  | -0.78666 | -1.51019 | -0.0329  | <b>C11</b>  | -0.95693 | -1.99844 | -0.03369 | <b>C96</b>  | -1.56878 | -0.90993 | 0.30061 |
| <b>C28</b>  | -0.83129 | -1.51536 | -0.02488 | <b>C11</b>  | -1.00156 | -0.95849 | -0.03369 | <b>C97</b>  | -1.46159 | -0.74225 | 0.31726 |
| <b>C29</b>  | -0.8351  | -1.47484 | -0.01479 | <b>C11</b>  | -3.04151 | -2.04307 | -0.03369 | <b>C98</b>  | -1.50608 | -0.78211 | 0.31688 |
| <b>C30</b>  | -0.79519 | -1.43054 | -0.01481 | <b>C11</b>  | -2.04151 | -3.04307 | -0.03369 | <b>C99</b>  | -1.51164 | -0.82655 | 0.2977  |
| <b>C31</b>  | -0.75046 | -1.42539 | -0.02371 | <b>C32</b>  | -1.66994 | -2.29181 | -0.02389 | <b>C100</b> | -1.47146 | -0.83028 | 0.2773  |
| <b>C32</b>  | -0.70819 | -1.37813 | -0.02389 | <b>C32</b>  | -1.66994 | -1.29181 | -0.02389 | <b>C101</b> | -1.42704 | -0.79054 | 0.27846 |
| <b>N33</b>  | -0.96088 | -1.95929 | -0.03364 | <b>C32</b>  | -2.70819 | -2.37813 | -0.02389 | <b>C102</b> | -1.42147 | -0.74601 | 0.29826 |
| <b>N34</b>  | -1.00272 | -1.78463 | -0.0339  | <b>C32</b>  | -1.62187 | -3.33006 | -0.02389 | <b>C103</b> | -1.37412 | -0.70392 | 0.29867 |
| <b>N35</b>  | -0.8713  | -1.56197 | -0.02607 | <b>C32</b>  | -0.62187 | -1.33006 | -0.02389 | <b>N105</b> | -1.95525 | -0.95672 | 0.30118 |
| <b>N36</b>  | -0.71245 | -1.3393  | -0.02395 | <b>N33</b>  | -1.99841 | -2.03912 | -0.03364 | <b>N106</b> | -1.78109 | -0.99908 | 0.30031 |
| <b>H109</b> | -1.05546 | -1.74854 | -0.03469 | <b>N33</b>  | -0.99841 | -2.03912 | -0.03364 | <b>N107</b> | -1.55832 | -0.86644 | 0.29734 |
| <b>H110</b> | -1.07172 | -1.68368 | -0.038   | <b>N33</b>  | -2.96088 | -1.95929 | -0.03364 | <b>N108</b> | -1.3689  | -0.66046 | 0.29871 |
| <b>H111</b> | -1.00699 | -1.60223 | -0.0376  | <b>N33</b>  | -0.96088 | -0.95929 | -0.03364 | <b>H115</b> | -1.74449 | -1.05126 | 0.29862 |
| <b>H1</b>   | -1.20597 | -1.12991 | -0.03212 | <b>N33</b>  | -2.04071 | -3.00159 | -0.03364 | <b>H116</b> | -1.67936 | -1.06706 | 0.30067 |
| <b>H2</b>   | -1.13254 | -1.05582 | -0.03172 | <b>N36</b>  | -1.62685 | -2.28755 | -0.02395 | <b>H117</b> | -1.59806 | -1.00203 | 0.30155 |
| <b>H3</b>   | -1.05618 | -1.13227 | -0.03489 | <b>N36</b>  | -1.62685 | -1.28755 | -0.02395 | <b>H64</b>  | -2.07913 | -0.87082 | 0.29904 |
| <b>H4</b>   | -1.13062 | -1.20516 | -0.03504 | <b>N36</b>  | -2.71245 | -2.3393  | -0.02395 | <b>H65</b>  | -2.0787  | -0.94421 | 0.2993  |
| <b>H5</b>   | -1.26751 | -1.2004  | -0.02731 | <b>N36</b>  | -1.71245 | -3.3393  | -0.02395 | <b>H66</b>  | -1.92786 | -0.86814 | 0.30235 |
| <b>H6</b>   | -1.45432 | -1.3784  | -0.04197 | <b>N36</b>  | -0.6607  | -1.37315 | -0.02395 | <b>H67</b>  | -1.9286  | -0.79467 | 0.30203 |
| <b>H7</b>   | -1.53675 | -1.24956 | -0.03984 | <b>H37</b>  | 0.4017   | -1.06409 | 0.63798  | <b>H68</b>  | -2.07093 | -0.80034 | 0.29529 |
| <b>H8</b>   | -1.45921 | -1.22409 | -0.04041 | <b>H38</b>  | 0.25863  | -1.27491 | 0.63124  | <b>H69</b>  | -2.08083 | -0.62266 | 0.30756 |
| <b>H9</b>   | -1.52345 | -1.39185 | -0.00588 | <b>H39</b>  | 0.25941  | -1.20069 | 0.62875  | <b>H70</b>  | -2.29145 | -0.7501  | 0.33337 |
| <b>H10</b>  | -1.59973 | -1.39925 | -0.00748 | <b>H40</b>  | 0.40971  | -1.12641 | 0.65232  | <b>H71</b>  | -2.22162 | -0.75805 | 0.33228 |
| <b>C11</b>  | -1.04151 | -1.04307 | -0.03369 | <b>H41</b>  | 0.40924  | -1.20026 | 0.65454  | <b>H72</b>  | -2.13661 | -0.61022 | 0.2587  |
| <b>C12</b>  | -1.17371 | -1.13067 | -0.0331  | <b>C42</b>  | 0.30852  | -1.04372 | 0.63493  | <b>H73</b>  | -2.20522 | -0.60223 | 0.2627  |
| <b>C13</b>  | -1.13172 | -1.08812 | -0.03306 | <b>C43</b>  | 0.29935  | -1.00698 | 0.63232  | <b>C82</b>  | -2.00267 | -0.95695 | 0.30123 |
| <b>C14</b>  | -1.08665 | -1.08763 | -0.034   | <b>C44</b>  | 0.33616  | -0.96115 | 0.62961  | <b>C83</b>  | -2.04587 | -0.86956 | 0.3002  |
| <b>C15</b>  | -1.0881  | -1.13068 | -0.03478 | <b>C45</b>  | 0.38224  | -0.95232 | 0.63011  | <b>C84</b>  | -2.04563 | -0.91185 | 0.30043 |
| <b>C16</b>  | -1.13076 | -1.17249 | -0.03486 | <b>N46</b>  | 0.39053  | -0.98885 | 0.63271  | <b>C85</b>  | -2.00324 | -0.91226 | 0.30142 |
| <b>C17</b>  | -1.17347 | -1.17314 | -0.03397 | <b>C47</b>  | 0.35501  | -1.03419 | 0.63486  | <b>C86</b>  | -1.96117 | -0.86934 | 0.30215 |
| <b>C18</b>  | -1.25862 | -1.22768 | -0.03072 | <b>C48</b>  | 0.36562  | -1.07263 | 0.63705  | <b>C87</b>  | -1.96148 | -0.82727 | 0.30198 |
| <b>N19</b>  | -1.34222 | -1.28689 | -0.03125 | <b>C49</b>  | 0.29192  | -1.24283 | 0.63533  | <b>C88</b>  | -2.00354 | -0.82678 | 0.30093 |
| <b>C20</b>  | -1.29682 | -1.27683 | -0.03202 | <b>C50</b>  | 0.29225  | -1.20043 | 0.63383  | <b>C89</b>  | -2.03485 | -0.77282 | 0.29759 |
| <b>C21</b>  | -1.28701 | -1.31358 | -0.03434 | <b>C51</b>  | 0.33425  | -1.1579  | 0.63909  | <b>N90</b>  | -2.05979 | -0.71395 | 0.29802 |
| <b>C22</b>  | -1.32358 | -1.35957 | -0.03613 | <b>C52</b>  | 0.37651  | -1.15838 | 0.6468   | <b>C91</b>  | -2.02425 | -0.72376 | 0.29803 |
| <b>C23</b>  | -1.36953 | -1.36888 | -0.03583 | <b>C53</b>  | 0.37623  | -1.20093 | 0.64821  | <b>C92</b>  | -1.97778 | -0.68681 | 0.29887 |
| <b>C24</b>  | -1.37861 | -1.33179 | -0.03313 | <b>C54</b>  | 0.3339   | -1.24371 | 0.64221  | <b>C93</b>  | -1.96862 | -0.64091 | 0.29994 |
| <b>C25</b>  | -1.42747 | -1.34223 | -0.03348 | <b>C55</b>  | 0.33329  | -1.28897 | 0.64316  | <b>C94</b>  | -2.00542 | -0.63186 | 0.30033 |
| <b>C26</b>  | -1.53419 | -1.28085 | -0.03246 | <b>N56</b>  | 0.62214  | -0.67016 | 0.62749  | <b>C95</b>  | -2.05152 | -0.66913 | 0.29916 |
| <b>C27</b>  | -1.48981 | -1.27647 | -0.0329  | <b>N57</b>  | 0.33167  | -1.11576 | 0.6372   | <b>C96</b>  | -2.09007 | -0.65885 | 0.30061 |
| <b>C28</b>  | -1.48464 | -1.31593 | -0.02488 | <b>N58</b>  | 0.37389  | -1.28996 | 0.64318  | <b>C97</b>  | -2.25775 | -0.71934 | 0.31726 |
| <b>C29</b>  | -1.52516 | -1.36026 | -0.01479 | <b>H59</b>  | 0.46727  | -0.80838 | 0.66862  | <b>C98</b>  | -2.21789 | -0.72397 | 0.31688 |
| <b>C30</b>  | -1.56946 | -1.36465 | -0.01481 | <b>H60</b>  | 0.53584  | -0.73173 | 0.66373  | <b>C99</b>  | -2.17345 | -0.68509 | 0.2977  |
| <b>C31</b>  | -1.57461 | -1.32507 | -0.02371 | <b>H61</b>  | 0.62211  | -0.79335 | 0.59316  | <b>C100</b> | -2.16972 | -0.64118 | 0.2773  |
| <b>C32</b>  | -1.62187 | -1.33006 | -0.02389 | <b>H62</b>  | 0.55231  | -0.87115 | 0.5951   | <b>C101</b> | -2.20946 | -0.6365  | 0.27846 |
| <b>N33</b>  | -1.04071 | -1.00159 | -0.03364 | <b>H63</b>  | 0.41158  | -0.87658 | 0.61819  | <b>C102</b> | -2.25399 | -0.67546 | 0.29826 |
| <b>N34</b>  | -1.21537 | -1.21809 | -0.0339  | <b>C74</b>  | 0.62669  | -0.70883 | 0.62752  | <b>C103</b> | -2.29608 | -0.6702  | 0.29867 |
| <b>N35</b>  | -1.43803 | -1.30933 | -0.02607 | <b>C75</b>  | 0.50039  | -0.80619 | 0.64973  | <b>N105</b> | -2.04328 | -0.99853 | 0.30118 |
| <b>N36</b>  | -1.6607  | -1.37315 | -0.02395 | <b>C76</b>  | 0.5401   | -0.76176 | 0.6481   | <b>N106</b> | -2.00092 | -0.78201 | 0.30031 |
| <b>H109</b> | -1.25146 | -1.30692 | -0.03469 | <b>C77</b>  | 0.58461  | -0.75619 | 0.62814  | <b>N107</b> | -2.13356 | -0.69188 | 0.29734 |
| <b>H110</b> | -1.31632 | -1.38804 | -0.038   | <b>C78</b>  | 0.5884   | -0.7963  | 0.60936  | <b>N108</b> | -2.33954 | -0.70844 | 0.29871 |
| <b>H111</b> | -1.39777 | -1.40476 | -0.0376  | <b>C79</b>  | 0.54857  | -0.84081 | 0.61021  | <b>H115</b> | -1.94874 | -0.69323 | 0.29862 |
| <b>H1</b>   | -1.92394 | -2.79403 | -0.03212 | <b>C80</b>  | 0.50414  | -0.84637 | 0.6296   | <b>H116</b> | -1.93294 | -0.6123  | 0.30067 |
| <b>H2</b>   | -1.92328 | -2.86746 | -0.03172 | <b>C81</b>  | 0.42079  | -0.90353 | 0.62681  | <b>H117</b> | -1.99797 | -0.59603 | 0.30155 |
| <b>H3</b>   | -2.07609 | -2.94382 | -0.03489 | <b>N104</b> | 0.46427  | -0.89305 | 0.63087  | <b>H64</b>  | -2.12918 | -1.20831 | 0.29904 |
| <b>H4</b>   | -2.07454 | -2.86938 | -0.03504 | <b>H112</b> | 0.27949  | -1.07917 | 0.637    | <b>H65</b>  | -2.05579 | -1.13449 | 0.2993  |
| <b>H5</b>   | -1.93289 | -2.73249 | -0.02731 | <b>H113</b> | 0.26368  | -1.01406 | 0.63222  | <b>H66</b>  | -2.13186 | -1.05972 | 0.30235 |



|      |          |          |          |      |          |          |         |      |          |          |         |
|------|----------|----------|----------|------|----------|----------|---------|------|----------|----------|---------|
| H6   | -1.92408 | -2.54568 | -0.04197 | H114 | 0.3287   | -0.93278 | 0.62726 | H67  | -2.20533 | -1.13393 | 0.30203 |
| H7   | -1.71281 | -2.46325 | -0.03984 | H37  | 0.06409  | -1.53421 | 0.63798 | H68  | -2.19966 | -1.27059 | 0.29529 |
| H8   | -1.78288 | -2.54079 | -0.04041 | H38  | 0.27491  | -1.46646 | 0.63124 | H69  | -2.37734 | -1.45817 | 0.30756 |
| H9   | -1.8684  | -2.47655 | -0.00588 | H39  | 0.20069  | -1.5399  | 0.62875 | H70  | -2.2499  | -1.54135 | 0.33337 |
| H10  | -1.79952 | -2.40027 | -0.00748 | H40  | 0.12641  | -1.46388 | 0.65232 | H71  | -2.24195 | -1.46357 | 0.33228 |
| C11  | -2.00156 | -2.95849 | -0.03369 | H41  | 0.20026  | -1.3905  | 0.65454 | H72  | -2.38978 | -1.52639 | 0.2587  |
| C12  | -1.95696 | -2.82629 | -0.0331  | C42  | 0.04372  | -1.64776 | 0.63493 | H73  | -2.39777 | -1.60299 | 0.2627  |
| C13  | -1.9564  | -2.86828 | -0.03306 | C43  | 0.00698  | -1.69367 | 0.63232 | C82  | -2.04305 | -1.04572 | 0.30123 |
| C14  | -2.00098 | -2.91335 | -0.034   | C44  | -0.03885 | -1.70269 | 0.62961 | C83  | -2.13044 | -1.17631 | 0.3002  |
| C15  | -2.04258 | -2.9119  | -0.03478 | C45  | -0.04768 | -1.66544 | 0.63011 | C84  | -2.08815 | -1.13378 | 0.30043 |
| C16  | -2.04173 | -2.86924 | -0.03486 | N46  | -0.01115 | -1.62062 | 0.63271 | C85  | -2.08774 | -1.09098 | 0.30142 |
| C17  | -1.99967 | -2.82653 | -0.03397 | C47  | 0.03419  | -1.6108  | 0.63486 | C86  | -2.13066 | -1.09183 | 0.30215 |
| C18  | -1.96906 | -2.74138 | -0.03072 | C48  | 0.07263  | -1.56175 | 0.63705 | C87  | -2.17273 | -1.13421 | 0.30198 |
| N19  | -1.94467 | -2.65778 | -0.03125 | C49  | 0.24283  | -1.46525 | 0.63533 | C88  | -2.17322 | -1.17676 | 0.30093 |
| C20  | -1.98001 | -2.70318 | -0.03202 | C50  | 0.20043  | -1.50732 | 0.63383 | C89  | -2.22718 | -1.26203 | 0.29759 |
| C21  | -2.02657 | -2.71299 | -0.03434 | C51  | 0.1579   | -1.50785 | 0.63909 | N90  | -2.28605 | -1.34584 | 0.29802 |
| C22  | -2.03599 | -2.67642 | -0.03613 | C52  | 0.15838  | -1.46511 | 0.6468  | C91  | -2.27624 | -1.30049 | 0.29803 |
| C23  | -1.99935 | -2.63047 | -0.03583 | C53  | 0.20093  | -1.42284 | 0.64821 | C92  | -2.31319 | -1.29097 | 0.29887 |
| C24  | -1.95318 | -2.62139 | -0.03313 | C54  | 0.24371  | -1.42239 | 0.64221 | C93  | -2.35909 | -1.32771 | 0.29994 |
| C25  | -1.91476 | -2.57253 | -0.03348 | C55  | 0.28897  | -1.37774 | 0.64316 | C94  | -2.36814 | -1.37356 | 0.30033 |
| C26  | -1.74666 | -2.46581 | -0.03246 | N56  | -0.32984 | -1.7077  | 0.62749 | C95  | -2.33087 | -1.38239 | 0.29916 |
| C27  | -1.78666 | -2.51019 | -0.0329  | N57  | 0.11576  | -1.55257 | 0.6372  | C96  | -2.34115 | -1.43122 | 0.30061 |
| C28  | -1.83129 | -2.51536 | -0.02488 | N58  | 0.28996  | -1.33615 | 0.64318 | C97  | -2.28066 | -1.53841 | 0.31726 |
| C29  | -1.8351  | -2.47484 | -0.01479 | H59  | -0.19162 | -1.72435 | 0.66862 | C98  | -2.27603 | -1.49392 | 0.31688 |
| C30  | -1.79519 | -2.43054 | -0.01481 | H60  | -0.26827 | -1.73243 | 0.66373 | C99  | -2.31491 | -1.48836 | 0.2977  |
| C31  | -1.75046 | -2.42539 | -0.02371 | H61  | -0.20665 | -1.58454 | 0.59316 | C100 | -2.35882 | -1.52854 | 0.2773  |
| C32  | -1.70819 | -2.37813 | -0.02389 | H62  | -0.12885 | -1.57654 | 0.5951  | C101 | -2.3635  | -1.57296 | 0.27846 |
| N33  | -1.96088 | -2.95929 | -0.03364 | H63  | -0.12342 | -1.71184 | 0.61819 | C102 | -2.32454 | -1.57853 | 0.29826 |
| N34  | -2.00272 | -2.78463 | -0.0339  | C74  | -0.29117 | -1.66448 | 0.62752 | C103 | -2.3298  | -1.62588 | 0.29867 |
| N35  | -1.8713  | -2.56197 | -0.02607 | C75  | -0.19381 | -1.69342 | 0.64973 | N105 | -2.00147 | -1.04475 | 0.30118 |
| N36  | -1.71245 | -2.3393  | -0.02395 | C76  | -0.23824 | -1.69814 | 0.6481  | N106 | -2.21799 | -1.21891 | 0.30031 |
| H109 | -2.05546 | -2.74854 | -0.03469 | C77  | -0.24381 | -1.6592  | 0.62814 | N107 | -2.30812 | -1.44168 | 0.29734 |
| H110 | -2.07172 | -2.68368 | -0.038   | C78  | -0.2037  | -1.6153  | 0.60936 | N108 | -2.29156 | -1.6311  | 0.29871 |
| H111 | -2.00699 | -2.60223 | -0.0376  | C79  | -0.15919 | -1.61062 | 0.61021 | H115 | -2.30677 | -1.25551 | 0.29862 |
| H1   | -1.20597 | -2.12991 | -0.03212 | C80  | -0.15363 | -1.64949 | 0.6296  | H116 | -2.3877  | -1.32064 | 0.30067 |
| H2   | -1.13254 | -2.05582 | -0.03172 | C81  | -0.09647 | -1.67568 | 0.62681 | H117 | -2.40397 | -1.40194 | 0.30155 |
| H3   | -1.05618 | -2.13227 | -0.03489 | N104 | -0.10695 | -1.64268 | 0.63087 | H64  | -3.07913 | -1.87082 | 0.29904 |
| H4   | -1.13062 | -2.20516 | -0.03504 | H112 | 0.07917  | -1.64134 | 0.637   | H65  | -3.0787  | -1.94421 | 0.2993  |
| H5   | -1.26751 | -2.2004  | -0.02731 | H113 | 0.01406  | -1.72226 | 0.63222 | H66  | -2.92786 | -1.86814 | 0.30235 |
| H6   | -1.45432 | -2.3784  | -0.04197 | H114 | -0.06722 | -1.73852 | 0.62726 | H67  | -2.9286  | -1.79467 | 0.30203 |
| H7   | -1.53675 | -2.24956 | -0.03984 | H37  | 0.53421  | -1.4017  | 0.63798 | H68  | -3.07093 | -1.80034 | 0.29529 |
| H8   | -1.45921 | -2.24209 | -0.04041 | H38  | 0.46646  | -1.25863 | 0.63124 | H69  | -3.08083 | -1.62266 | 0.30756 |
| H9   | -1.52345 | -2.39185 | -0.00588 | H39  | 0.5399   | -1.25941 | 0.62875 | H70  | -3.29145 | -1.7501  | 0.33337 |
| H10  | -1.59973 | -2.39925 | -0.00748 | H40  | 0.46388  | -1.40971 | 0.65232 | H71  | -3.22162 | -1.75805 | 0.33228 |
| C11  | -1.04151 | -2.04307 | -0.03369 | H41  | 0.3905   | -1.40924 | 0.65454 | H72  | -3.13661 | -1.61022 | 0.2587  |
| C12  | -1.17371 | -2.13067 | -0.0331  | C42  | 0.64776  | -1.30852 | 0.63493 | H73  | -3.20522 | -1.60223 | 0.2627  |
| C13  | -1.13172 | -2.08812 | -0.03306 | C43  | 0.69367  | -1.29935 | 0.63232 | C82  | -3.00267 | -1.95695 | 0.30123 |
| C14  | -1.08665 | -2.08763 | -0.034   | C44  | 0.70269  | -1.33616 | 0.62961 | C83  | -3.04587 | -1.86956 | 0.3002  |
| C15  | -1.0881  | -2.13068 | -0.03478 | C45  | 0.66544  | -1.38224 | 0.63011 | C84  | -3.04563 | -1.91185 | 0.30043 |
| C16  | -1.13076 | -2.17249 | -0.03486 | N46  | 0.62062  | -1.39053 | 0.63271 | C85  | -3.00324 | -1.91226 | 0.30142 |
| C17  | -1.17347 | -2.17314 | -0.03397 | C47  | 0.6108   | -1.35501 | 0.63486 | C86  | -2.96117 | -1.86934 | 0.30215 |
| C18  | -1.25862 | -2.22768 | -0.03072 | C48  | 0.56175  | -1.36562 | 0.63705 | C87  | -2.96148 | -1.82727 | 0.30198 |
| N19  | -1.34222 | -2.28689 | -0.03125 | C49  | 0.46525  | -1.29192 | 0.63533 | C88  | -3.00354 | -1.82678 | 0.30093 |
| C20  | -1.29682 | -2.27683 | -0.03202 | C50  | 0.50732  | -1.29225 | 0.63383 | C89  | -3.03485 | -1.77282 | 0.29759 |
| C21  | -1.28701 | -2.31358 | -0.03434 | C51  | 0.50785  | -1.33425 | 0.63909 | N90  | -3.05979 | -1.71395 | 0.29802 |
| C22  | -1.32358 | -2.35957 | -0.03613 | C52  | 0.46511  | -1.37651 | 0.6468  | C91  | -3.02425 | -1.72376 | 0.29803 |
| C23  | -1.36953 | -2.36888 | -0.03583 | C53  | 0.42284  | -1.37623 | 0.64821 | C92  | -2.97778 | -1.68681 | 0.29887 |
| C24  | -1.37861 | -2.33179 | -0.03313 | C54  | 0.42239  | -1.3339  | 0.64221 | C93  | -2.96862 | -1.64091 | 0.29994 |
| C25  | -1.42747 | -2.34223 | -0.03348 | C55  | 0.37774  | -1.33329 | 0.64316 | C94  | -3.00542 | -1.63186 | 0.30033 |
| C26  | -1.53419 | -2.28085 | -0.03246 | N56  | 0.7077   | -1.62214 | 0.62749 | C95  | -3.05152 | -1.66913 | 0.29916 |
| C27  | -1.48981 | -2.27647 | -0.0329  | N57  | 0.55257  | -1.33167 | 0.6372  | C96  | -3.09007 | -1.65885 | 0.30061 |
| C28  | -1.48464 | -2.31593 | -0.02488 | N58  | 0.33615  | -1.37389 | 0.64318 | C97  | -3.25775 | -1.71934 | 0.31726 |
| C29  | -1.52516 | -2.36026 | -0.01479 | H59  | 0.72435  | -1.46727 | 0.66862 | C98  | -3.21789 | -1.72397 | 0.31688 |
| C30  | -1.56946 | -2.36465 | -0.01481 | H60  | 0.73243  | -1.53584 | 0.66373 | C99  | -3.17345 | -1.68509 | 0.2977  |

|             |          |          |          |             |          |          |         |             |          |          |         |
|-------------|----------|----------|----------|-------------|----------|----------|---------|-------------|----------|----------|---------|
| <b>C31</b>  | -1.57461 | -2.32507 | -0.02371 | <b>H61</b>  | 0.58454  | -1.62211 | 0.59316 | <b>C100</b> | -3.16972 | -1.64118 | 0.2773  |
| <b>C32</b>  | -1.62187 | -2.33006 | -0.02389 | <b>H62</b>  | 0.57654  | -1.55231 | 0.5951  | <b>C101</b> | -3.20946 | -1.6365  | 0.27846 |
| <b>N33</b>  | -1.04071 | -2.00159 | -0.03364 | <b>H63</b>  | 0.71184  | -1.41158 | 0.61819 | <b>C102</b> | -3.25399 | -1.67546 | 0.29826 |
| <b>N34</b>  | -1.21537 | -2.21809 | -0.0339  | <b>C74</b>  | 0.66448  | -1.62669 | 0.62752 | <b>C103</b> | -3.29608 | -1.6702  | 0.29867 |
| <b>N35</b>  | -1.43803 | -2.30933 | -0.02607 | <b>C75</b>  | 0.69342  | -1.50039 | 0.64973 | <b>N105</b> | -3.04328 | -1.99853 | 0.30118 |
| <b>N36</b>  | -1.6607  | -2.37315 | -0.02395 | <b>C76</b>  | 0.69814  | -1.5401  | 0.6481  | <b>N106</b> | -3.00092 | -1.78201 | 0.30031 |
| <b>H109</b> | -1.25146 | -2.30692 | -0.03469 | <b>C77</b>  | 0.6592   | -1.58461 | 0.62814 | <b>N107</b> | -3.13356 | -1.69188 | 0.29734 |
| <b>H110</b> | -1.31632 | -2.38804 | -0.038   | <b>C78</b>  | 0.6153   | -1.5884  | 0.60936 | <b>N108</b> | -3.33954 | -1.70844 | 0.29871 |
| <b>H111</b> | -1.39777 | -2.40476 | -0.0376  | <b>C79</b>  | 0.61062  | -1.54857 | 0.61021 | <b>H115</b> | -2.94874 | -1.69323 | 0.29862 |
| <b>H1</b>   | -1.87009 | -3.07606 | -0.03212 | <b>C80</b>  | 0.64949  | -1.50414 | 0.6296  | <b>H116</b> | -2.93294 | -1.6123  | 0.30067 |
| <b>H2</b>   | -1.94418 | -3.07672 | -0.03172 | <b>C81</b>  | 0.67568  | -1.42079 | 0.62681 | <b>H117</b> | -2.99797 | -1.59603 | 0.30155 |
| <b>H3</b>   | -1.86773 | -2.92391 | -0.03489 | <b>N104</b> | 0.64268  | -1.46427 | 0.63087 | <b>H64</b>  | -3.12918 | -2.20831 | 0.29904 |
| <b>H4</b>   | -1.79484 | -2.92546 | -0.03504 | <b>H112</b> | 0.64134  | -1.27949 | 0.637   | <b>H65</b>  | -3.05579 | -2.13449 | 0.2993  |
| <b>H5</b>   | -1.7996  | -3.06711 | -0.02731 | <b>H113</b> | 0.72226  | -1.26368 | 0.63222 | <b>H66</b>  | -3.13186 | -2.05972 | 0.30235 |
| <b>H6</b>   | -1.6216  | -3.07592 | -0.04197 | <b>H114</b> | 0.73852  | -1.3287  | 0.62726 | <b>H67</b>  | -3.20533 | -2.13393 | 0.30203 |
| <b>H7</b>   | -1.75044 | -3.28719 | -0.03984 | <b>H37</b>  | -0.93591 | -2.53421 | 0.63798 | <b>H68</b>  | -3.19966 | -2.27059 | 0.29529 |
| <b>H8</b>   | -1.75044 | -3.21712 | -0.04041 | <b>H38</b>  | -0.72509 | -2.46646 | 0.63124 | <b>H69</b>  | -3.37734 | -2.45817 | 0.30756 |
| <b>H9</b>   | -1.60815 | -3.1316  | -0.00588 | <b>H39</b>  | -0.79931 | -2.5399  | 0.62875 | <b>H70</b>  | -3.2499  | -2.54135 | 0.33337 |
| <b>H10</b>  | -1.60075 | -3.20048 | -0.00748 | <b>H40</b>  | -0.87359 | -2.46388 | 0.65232 | <b>H71</b>  | -3.24195 | -2.46357 | 0.33228 |
| <b>C11</b>  | -1.95693 | -2.99844 | -0.03369 | <b>H41</b>  | -0.79974 | -2.3905  | 0.65454 | <b>H72</b>  | -3.38978 | -2.52639 | 0.2587  |
| <b>C12</b>  | -1.86933 | -3.04304 | -0.0331  | <b>C42</b>  | -0.95628 | -2.64776 | 0.63493 | <b>H73</b>  | -3.39777 | -2.60299 | 0.2627  |
| <b>C13</b>  | -1.91188 | -3.0436  | -0.03306 | <b>C43</b>  | -0.99302 | -2.69367 | 0.63232 | <b>C82</b>  | -3.04305 | -2.04572 | 0.30123 |
| <b>C14</b>  | -1.91237 | -2.99902 | -0.034   | <b>C44</b>  | -1.03885 | -2.70269 | 0.62961 | <b>C83</b>  | -3.13044 | -2.17631 | 0.3002  |
| <b>C15</b>  | -1.86932 | -2.95742 | -0.03478 | <b>C45</b>  | -1.04768 | -2.66544 | 0.63011 | <b>C84</b>  | -3.08815 | -2.13378 | 0.30043 |
| <b>C16</b>  | -1.82751 | -2.95827 | -0.03486 | <b>N46</b>  | -1.01115 | -2.62062 | 0.63271 | <b>C85</b>  | -3.08774 | -2.09098 | 0.30142 |
| <b>C17</b>  | -1.82686 | -3.00033 | -0.03397 | <b>C47</b>  | -0.96581 | -2.6108  | 0.63486 | <b>C86</b>  | -3.13066 | -2.09183 | 0.30215 |
| <b>C18</b>  | -1.77232 | -3.03094 | -0.03072 | <b>C48</b>  | -0.92737 | -2.56175 | 0.63705 | <b>C87</b>  | -3.17273 | -2.13421 | 0.30198 |
| <b>N19</b>  | -1.71311 | -3.05533 | -0.03125 | <b>C49</b>  | -0.75717 | -2.46525 | 0.63533 | <b>C88</b>  | -3.17322 | -2.17676 | 0.30093 |
| <b>C20</b>  | -1.72317 | -3.01999 | -0.03202 | <b>C50</b>  | -0.79957 | -2.50732 | 0.63383 | <b>C89</b>  | -3.22718 | -2.26203 | 0.29759 |
| <b>C21</b>  | -1.68642 | -2.97343 | -0.03434 | <b>C51</b>  | -0.8421  | -2.50785 | 0.63909 | <b>N90</b>  | -3.28605 | -2.34584 | 0.29802 |
| <b>C22</b>  | -1.64043 | -2.96401 | -0.03613 | <b>C52</b>  | -0.84162 | -2.46511 | 0.6468  | <b>C91</b>  | -3.27624 | -2.30049 | 0.29803 |
| <b>C23</b>  | -1.63112 | -3.00065 | -0.03583 | <b>C53</b>  | -0.79907 | -2.42284 | 0.64821 | <b>C92</b>  | -3.31319 | -2.29097 | 0.29887 |
| <b>C24</b>  | -1.66821 | -3.04682 | -0.03313 | <b>C54</b>  | -0.75629 | -2.42239 | 0.64221 | <b>C93</b>  | -3.35909 | -2.32771 | 0.29994 |
| <b>C25</b>  | -1.65777 | -3.08524 | -0.03348 | <b>C55</b>  | -0.71103 | -2.37774 | 0.64316 | <b>C94</b>  | -3.36814 | -2.37356 | 0.30033 |
| <b>C26</b>  | -1.71915 | -3.25334 | -0.03246 | <b>N56</b>  | -1.32984 | -2.7077  | 0.62749 | <b>C95</b>  | -3.33087 | -2.38239 | 0.29916 |
| <b>C27</b>  | -1.72353 | -3.21334 | -0.0329  | <b>N57</b>  | -0.88424 | -2.55257 | 0.6372  | <b>C96</b>  | -3.34115 | -2.43122 | 0.30061 |
| <b>C28</b>  | -1.68407 | -3.16871 | -0.02488 | <b>N58</b>  | -0.71004 | -2.33615 | 0.64318 | <b>C97</b>  | -3.28066 | -2.53841 | 0.31726 |
| <b>C29</b>  | -1.63974 | -3.1649  | -0.01479 | <b>H59</b>  | -1.19162 | -2.72435 | 0.66862 | <b>C98</b>  | -3.27603 | -2.49392 | 0.31688 |
| <b>C30</b>  | -1.63535 | -3.20481 | -0.01481 | <b>H60</b>  | -1.26827 | -2.73243 | 0.66373 | <b>C99</b>  | -3.31491 | -2.48836 | 0.2977  |
| <b>C31</b>  | -1.67493 | -3.24954 | -0.02371 | <b>H61</b>  | -1.20665 | -2.58454 | 0.59316 | <b>C100</b> | -3.35882 | -2.52854 | 0.2773  |
| <b>C32</b>  | -1.66994 | -3.29181 | -0.02389 | <b>H62</b>  | -1.12885 | -2.57654 | 0.5951  | <b>C101</b> | -3.3635  | -2.57296 | 0.27846 |
| <b>N33</b>  | -1.99841 | -3.03912 | -0.03364 | <b>H63</b>  | -1.12342 | -2.71184 | 0.61819 | <b>C102</b> | -3.32454 | -2.57853 | 0.29826 |
| <b>N34</b>  | -1.78191 | -2.99728 | -0.0339  | <b>C74</b>  | -1.29117 | -2.66448 | 0.62752 | <b>C103</b> | -3.3298  | -2.62588 | 0.29867 |
| <b>N35</b>  | -1.69067 | -3.1287  | -0.02607 | <b>C75</b>  | -1.19381 | -2.69342 | 0.64973 | <b>N105</b> | -3.00147 | -2.04475 | 0.30118 |
| <b>N36</b>  | -1.62685 | -3.28755 | -0.02395 | <b>C76</b>  | -1.23824 | -2.69814 | 0.6481  | <b>N106</b> | -3.21799 | -2.21891 | 0.30031 |
| <b>H109</b> | -1.69308 | -2.94454 | -0.03469 | <b>C77</b>  | -1.24381 | -2.6592  | 0.62814 | <b>N107</b> | -3.30812 | -2.44168 | 0.29734 |
| <b>H110</b> | -1.61196 | -2.92828 | -0.038   | <b>C78</b>  | -1.2037  | -2.6153  | 0.60936 | <b>N108</b> | -3.29156 | -2.6311  | 0.29871 |
| <b>H111</b> | -1.59524 | -2.99301 | -0.0376  | <b>C79</b>  | -1.15919 | -2.61062 | 0.61021 | <b>H115</b> | -3.30677 | -2.25551 | 0.29862 |
| <b>H1</b>   | -2.20597 | -2.12991 | -0.03212 | <b>C80</b>  | -1.15363 | -2.64949 | 0.6296  | <b>H116</b> | -3.3877  | -2.32064 | 0.30067 |
| <b>H2</b>   | -2.13254 | -2.05582 | -0.03172 | <b>C81</b>  | -1.09647 | -2.67568 | 0.62681 | <b>H117</b> | -3.40397 | -2.40194 | 0.30155 |
| <b>H3</b>   | -2.05618 | -2.13227 | -0.03489 | <b>N104</b> | -1.10695 | -2.64268 | 0.63087 | <b>H64</b>  | -2.79169 | -1.92087 | 0.29904 |
| <b>H4</b>   | -2.13062 | -2.20516 | -0.03504 | <b>H112</b> | -0.92083 | -2.64134 | 0.637   | <b>H65</b>  | -2.86551 | -1.9213  | 0.2993  |
| <b>H5</b>   | -2.26751 | -2.2004  | -0.02731 | <b>H113</b> | -0.98594 | -2.72226 | 0.63222 | <b>H66</b>  | -2.94028 | -2.07214 | 0.30235 |
| <b>H6</b>   | -2.45432 | -2.3784  | -0.04197 | <b>H114</b> | -1.06722 | -2.73852 | 0.62726 | <b>H67</b>  | -2.86607 | -2.0714  | 0.30203 |
| <b>H7</b>   | -2.53675 | -2.24956 | -0.03984 | <b>H37</b>  | -0.46579 | -2.4017  | 0.63798 | <b>H68</b>  | -2.72941 | -1.92907 | 0.29529 |
| <b>H8</b>   | -2.45921 | -2.24209 | -0.04041 | <b>H38</b>  | -0.53354 | -2.25863 | 0.63124 | <b>H69</b>  | -2.54183 | -1.91917 | 0.30756 |
| <b>H9</b>   | -2.52345 | -2.39185 | -0.00588 | <b>H39</b>  | -0.4601  | -2.25941 | 0.62875 | <b>H70</b>  | -2.45865 | -1.70855 | 0.33337 |
| <b>H10</b>  | -2.59973 | -2.39925 | -0.00748 | <b>H40</b>  | -0.53612 | -2.40971 | 0.65232 | <b>H71</b>  | -2.53643 | -1.77838 | 0.33228 |
| <b>C11</b>  | -2.04151 | -2.04307 | -0.03369 | <b>H41</b>  | -0.6095  | -2.40924 | 0.65454 | <b>H72</b>  | -2.47361 | -1.86339 | 0.2587  |
| <b>C12</b>  | -2.17371 | -2.13067 | -0.0331  | <b>C42</b>  | -0.35224 | -2.30852 | 0.63493 | <b>H73</b>  | -2.39701 | -1.79478 | 0.2627  |
| <b>C13</b>  | -2.13172 | -2.08812 | -0.03306 | <b>C43</b>  | -0.30633 | -2.29935 | 0.63232 | <b>C82</b>  | -2.95428 | -1.99733 | 0.30123 |
| <b>C14</b>  | -2.08665 | -2.08763 | -0.034   | <b>C44</b>  | -0.29731 | -2.33616 | 0.62961 | <b>C83</b>  | -2.82369 | -1.95413 | 0.3002  |
| <b>C15</b>  | -2.0881  | -2.13068 | -0.03478 | <b>C45</b>  | -0.33456 | -2.38224 | 0.63011 | <b>C84</b>  | -2.86622 | -1.95437 | 0.30043 |
| <b>C16</b>  | -2.13076 | -2.17249 | -0.03486 | <b>N46</b>  | -0.37938 | -2.39053 | 0.63271 | <b>C85</b>  | -2.90902 | -1.99676 | 0.30142 |

|             |          |          |          |             |          |          |         |             |          |          |         |
|-------------|----------|----------|----------|-------------|----------|----------|---------|-------------|----------|----------|---------|
| <b>C17</b>  | -2.17347 | -2.17314 | -0.03397 | <b>C47</b>  | -0.3892  | -2.35501 | 0.63486 | <b>C86</b>  | -2.90817 | -2.03883 | 0.30215 |
| <b>C18</b>  | -2.25862 | -2.22768 | -0.03072 | <b>C48</b>  | -0.43825 | -2.36562 | 0.63705 | <b>C87</b>  | -2.86579 | -2.03852 | 0.30198 |
| <b>N19</b>  | -2.34222 | -2.28689 | -0.03125 | <b>C49</b>  | -0.53475 | -2.29192 | 0.63533 | <b>C88</b>  | -2.82324 | -1.99646 | 0.30093 |
| <b>C20</b>  | -2.29682 | -2.27683 | -0.03202 | <b>C50</b>  | -0.49268 | -2.29225 | 0.63383 | <b>C89</b>  | -2.73797 | -1.96515 | 0.29759 |
| <b>C21</b>  | -2.28701 | -2.31358 | -0.03434 | <b>C51</b>  | -0.49215 | -2.33425 | 0.63909 | <b>N90</b>  | -2.65416 | -1.94021 | 0.29802 |
| <b>C22</b>  | -2.32358 | -2.35957 | -0.03613 | <b>C52</b>  | -0.53489 | -2.37651 | 0.6468  | <b>C91</b>  | -2.69951 | -1.97575 | 0.29803 |
| <b>C23</b>  | -2.36953 | -2.36888 | -0.03583 | <b>C53</b>  | -0.57716 | -2.37623 | 0.64821 | <b>C92</b>  | -2.70903 | -2.02222 | 0.29887 |
| <b>C24</b>  | -2.37861 | -2.33179 | -0.03313 | <b>C54</b>  | -0.57761 | -2.3339  | 0.64221 | <b>C93</b>  | -2.67229 | -2.03138 | 0.29994 |
| <b>C25</b>  | -2.42747 | -2.34223 | -0.03348 | <b>C55</b>  | -0.62226 | -2.33329 | 0.64316 | <b>C94</b>  | -2.62644 | -1.99458 | 0.30033 |
| <b>C26</b>  | -2.53419 | -2.28085 | -0.03246 | <b>N56</b>  | -0.2923  | -2.62214 | 0.62749 | <b>C95</b>  | -2.61761 | -1.94848 | 0.29916 |
| <b>C27</b>  | -2.48981 | -2.27647 | -0.0329  | <b>N57</b>  | -0.44743 | -2.33167 | 0.6372  | <b>C96</b>  | -2.56878 | -1.90993 | 0.30061 |
| <b>C28</b>  | -2.48464 | -2.31593 | -0.02488 | <b>N58</b>  | -0.66385 | -2.37389 | 0.64318 | <b>C97</b>  | -2.46159 | -1.74225 | 0.31726 |
| <b>C29</b>  | -2.52516 | -2.36026 | -0.01479 | <b>H59</b>  | -0.27565 | -2.46727 | 0.66862 | <b>C98</b>  | -2.50608 | -1.78211 | 0.31688 |
| <b>C30</b>  | -2.56946 | -2.36465 | -0.01481 | <b>H60</b>  | -0.26757 | -2.53584 | 0.66373 | <b>C99</b>  | -2.51164 | -1.82655 | 0.2977  |
| <b>C31</b>  | -2.57461 | -2.32507 | -0.02371 | <b>H61</b>  | -0.41546 | -2.62211 | 0.59316 | <b>C100</b> | -2.47146 | -1.83028 | 0.2773  |
| <b>C32</b>  | -2.62187 | -2.33006 | -0.02389 | <b>H62</b>  | -0.42346 | -2.55231 | 0.5951  | <b>C101</b> | -2.42704 | -1.79054 | 0.27846 |
| <b>N33</b>  | -2.04071 | -2.00159 | -0.03364 | <b>H63</b>  | -0.28816 | -2.41158 | 0.61819 | <b>C102</b> | -2.42147 | -1.74601 | 0.29826 |
| <b>N34</b>  | -2.21537 | -2.21809 | -0.0339  | <b>C74</b>  | -0.33552 | -2.62669 | 0.62752 | <b>C103</b> | -2.37412 | -1.70392 | 0.29867 |
| <b>N35</b>  | -2.43803 | -2.30933 | -0.02607 | <b>C75</b>  | -0.30658 | -2.50039 | 0.64973 | <b>N105</b> | -2.95525 | -1.95672 | 0.30118 |
| <b>N36</b>  | -2.6607  | -2.37315 | -0.02395 | <b>C76</b>  | -0.30186 | -2.5401  | 0.6481  | <b>N106</b> | -2.78109 | -1.99908 | 0.30031 |
| <b>H109</b> | -2.25146 | -2.30692 | -0.03469 | <b>C77</b>  | -0.3408  | -2.58461 | 0.62814 | <b>N107</b> | -2.55832 | -1.86644 | 0.29734 |
| <b>H110</b> | -2.31632 | -2.38804 | -0.038   | <b>C78</b>  | -0.3847  | -2.5884  | 0.60936 | <b>N108</b> | -2.3689  | -1.66046 | 0.29871 |
| <b>H111</b> | -2.39777 | -2.40476 | -0.0376  | <b>C79</b>  | -0.38938 | -2.54857 | 0.61021 | <b>H115</b> | -2.74449 | -2.05126 | 0.29862 |
| <b>H1</b>   | -2.87009 | -2.07606 | -0.03212 | <b>C80</b>  | -0.35051 | -2.50414 | 0.6296  | <b>H116</b> | -2.67936 | -2.06706 | 0.30067 |
| <b>H2</b>   | -2.94418 | -2.07672 | -0.03172 | <b>C81</b>  | -0.32432 | -2.42079 | 0.62681 | <b>H117</b> | -2.59806 | -2.00203 | 0.30155 |
| <b>H3</b>   | -2.86773 | -1.92391 | -0.03489 | <b>N104</b> | -0.35732 | -2.46427 | 0.63087 | <b>C103</b> | -3.37412 | -1.70392 | 0.29867 |
| <b>H4</b>   | -2.79484 | -1.92546 | -0.03504 | <b>H112</b> | -0.35866 | -2.27949 | 0.637   | <b>C103</b> | -2.37412 | -0.70392 | 0.29867 |
| <b>H5</b>   | -2.7996  | -2.06711 | -0.02731 | <b>H113</b> | -0.27774 | -2.26368 | 0.63222 | <b>C103</b> | -3.29608 | -2.6702  | 0.29867 |
| <b>H6</b>   | -2.6216  | -2.07592 | -0.04197 | <b>H114</b> | -0.26148 | -2.3287  | 0.62726 | <b>C103</b> | -2.29608 | -1.6702  | 0.29867 |
| <b>H7</b>   | -2.75044 | -2.28719 | -0.03984 | <b>H37</b>  | -0.5983  | -2.06409 | 0.63798 | <b>C103</b> | -1.3298  | -0.62588 | 0.29867 |
| <b>H8</b>   | -2.75791 | -2.21712 | -0.04041 | <b>H38</b>  | -0.74137 | -2.27491 | 0.63124 | <b>N108</b> | -3.3689  | -2.66046 | 0.29871 |
| <b>H9</b>   | -2.60815 | -2.1316  | -0.00588 | <b>H39</b>  | -0.74059 | -2.20069 | 0.62875 | <b>N108</b> | -2.33954 | -1.70844 | 0.29871 |
| <b>H10</b>  | -2.60075 | -2.20048 | -0.00748 | <b>H40</b>  | -0.59029 | -2.12641 | 0.65232 | <b>N108</b> | -1.33954 | -0.70844 | 0.29871 |
| <b>C11</b>  | -2.95693 | -1.99844 | -0.03369 | <b>H41</b>  | -0.59076 | -2.20026 | 0.65454 | <b>N108</b> | -3.29156 | -1.6311  | 0.29871 |
| <b>C12</b>  | -2.86933 | -2.04304 | -0.0331  | <b>C42</b>  | -0.69148 | -2.04372 | 0.63493 | <b>N108</b> | -2.29156 | -0.6311  | 0.29871 |
| <b>C13</b>  | -2.91188 | -2.0436  | -0.03306 | <b>C43</b>  | -0.70065 | -2.00698 | 0.63232 |             |          |          |         |
| <b>C14</b>  | -2.91237 | -1.99902 | -0.034   | <b>C44</b>  | -0.66384 | -1.96115 | 0.62961 |             |          |          |         |

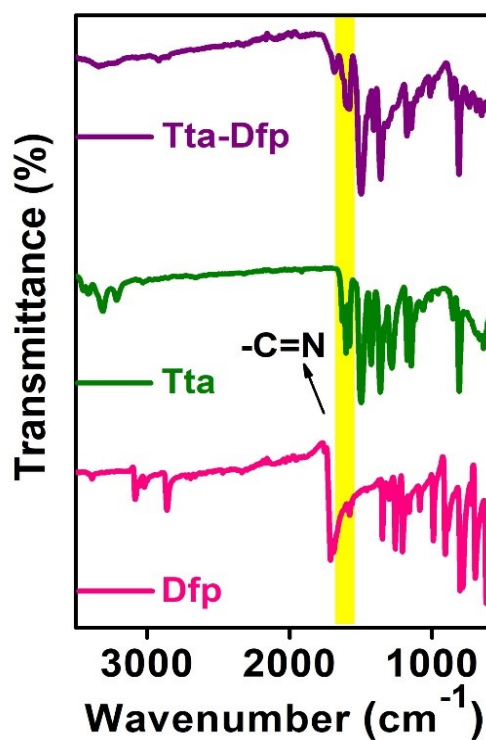

Fig. S3 FT-IR spectra of Tta, Dfp and Tta-Dfp.<sup>1</sup>

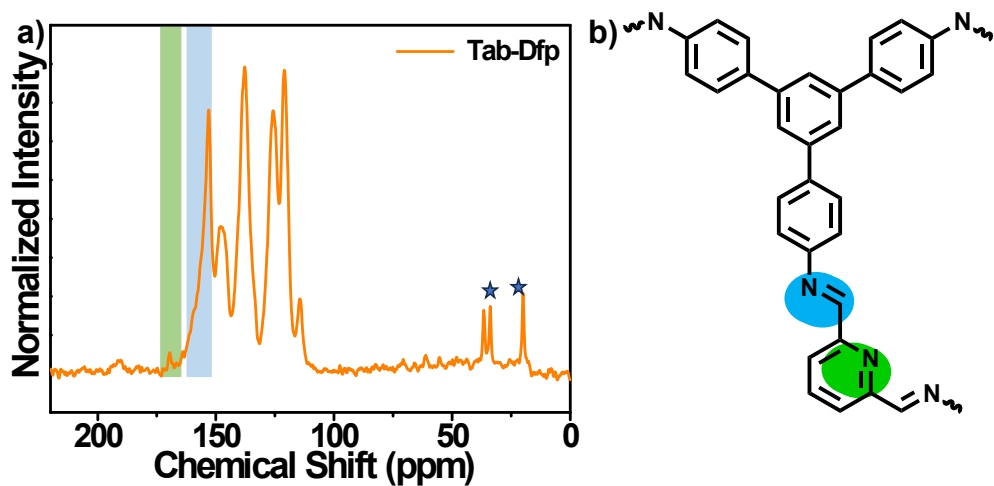

Fig. S4 a) <sup>13</sup>C CPMAS NMR spectrum of **Tab-Dfp** b) Structural building unit of **Tab-Dfp**; asterisks denote spinning sidebands or trapped trace of washing solvent (DMAc) due to the microporous network.<sup>1</sup>

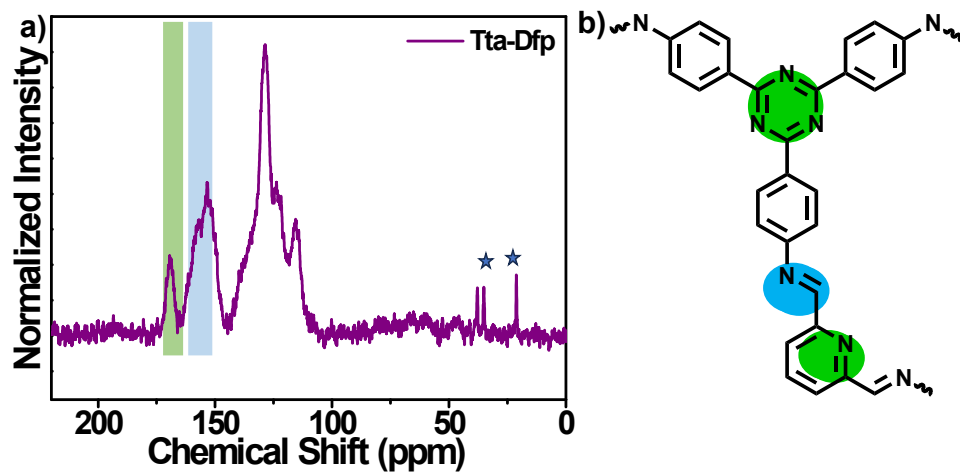

**Fig. S5** a)  $^{13}\text{C}$  CPMAS NMR spectrum of **Tta-Dfp** b) Structural building unit of **Tta-Dfp**; asterisks denote spinning sidebands or trapped trace of washing solvent (DMAc) due to the microporous network.<sup>1</sup>

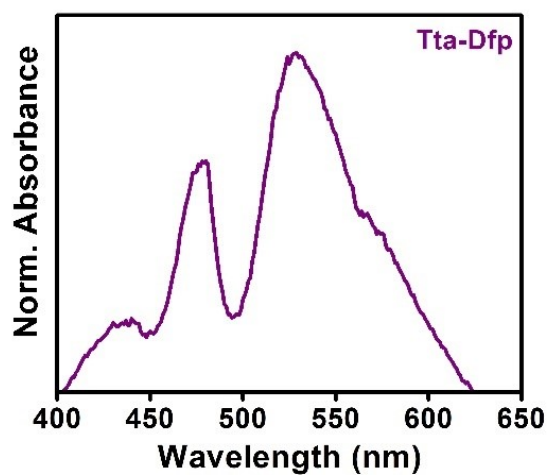

**Fig. S6** UV-Vis spectra of **Tta-Dfp**.<sup>1</sup>

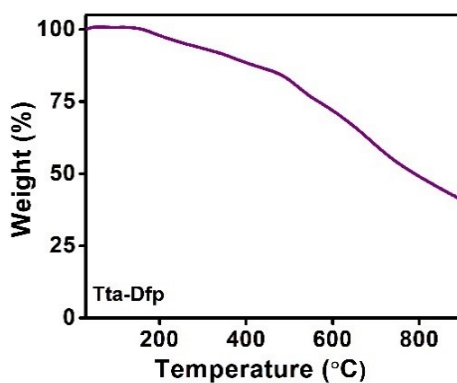

**Fig. S7** TGA of **Tta-Dfp**.<sup>1</sup>

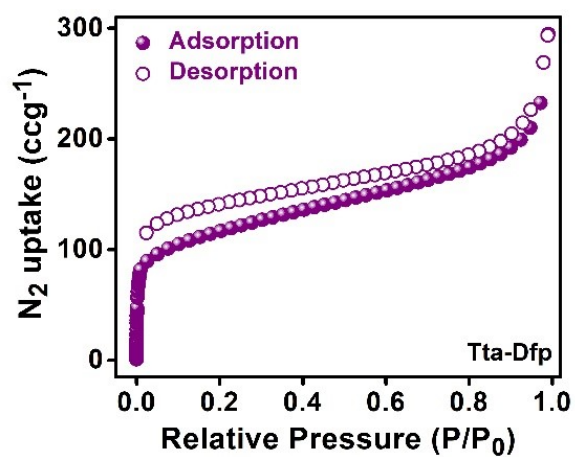

Fig. S8 BET N<sub>2</sub> adsorption/desorption of Tta-Dfp.<sup>1</sup>

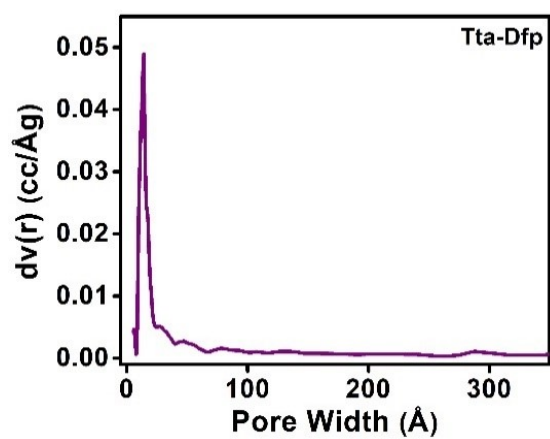

Fig. S9 Pore-size distribution profile of Tta-Dfp.<sup>1</sup>

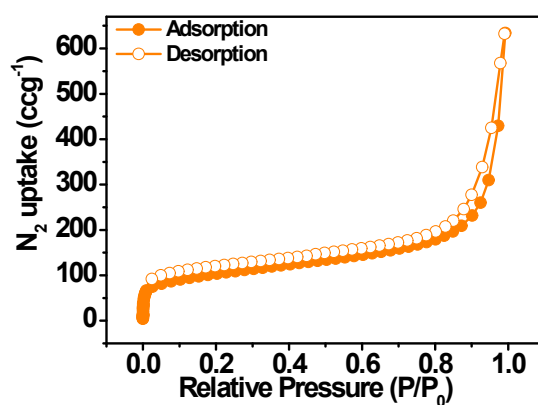

Fig. S10 BET N<sub>2</sub> adsorption/desorption of Tab-Dfp.<sup>1</sup>

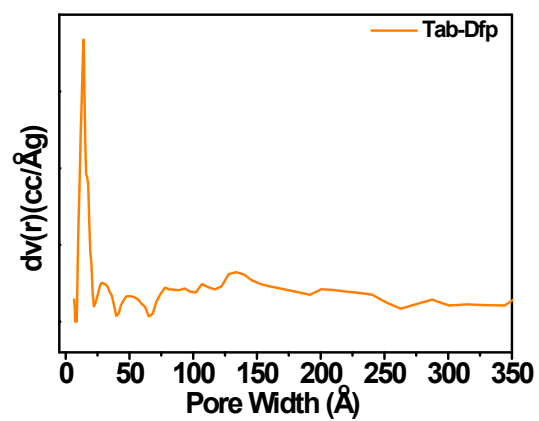

Fig. S11 Pore-size distribution profile of Tab-Dfp.<sup>1</sup>

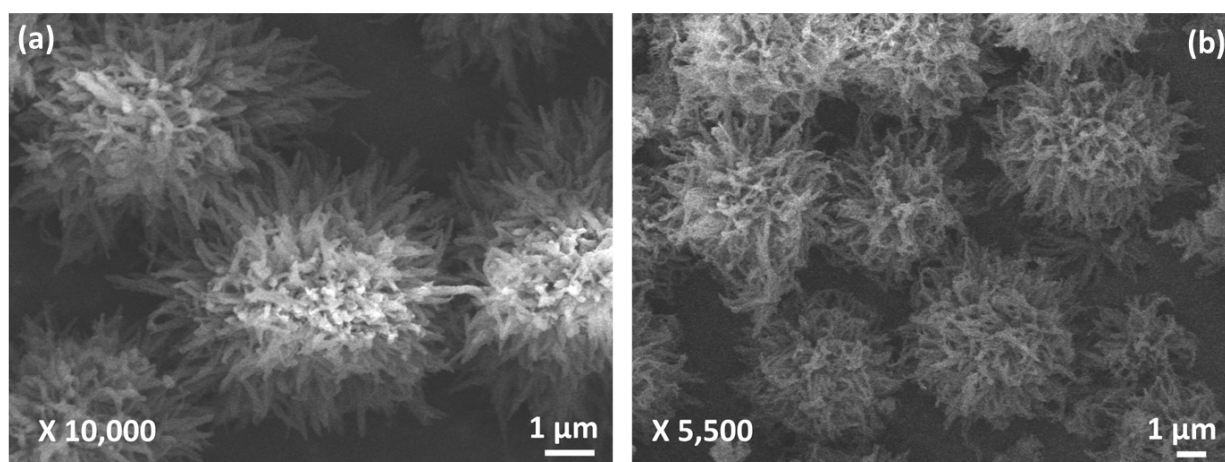

Fig. S12 FE-SEM images for (a) Tta-Dfp and (b) Tab-Dfp.

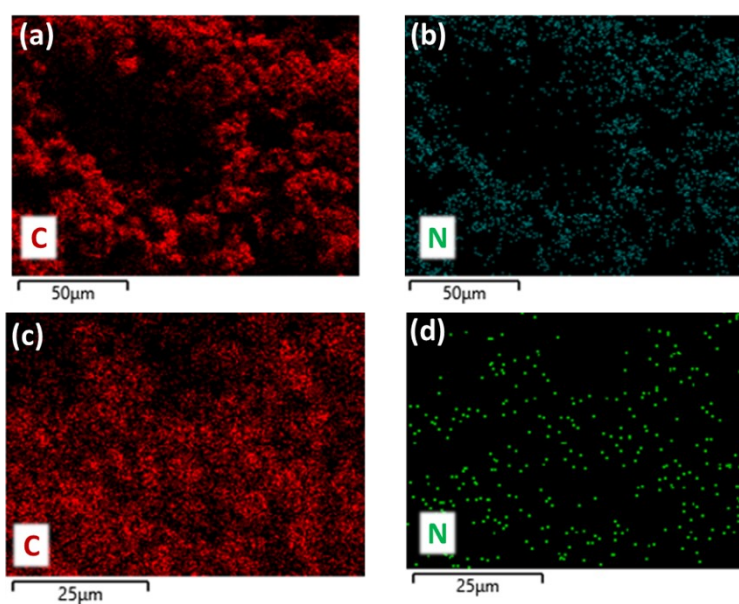

**Fig. S13** Elemental dot mapping images for (a) C, (b) N in **Tta-Dfp** and (c) C, (d) N in **Tab-Dfp**.

| <b>Table S2.</b> Elemental composition (weight percentage) analysis of all the elements. |         |         |         |         |
|------------------------------------------------------------------------------------------|---------|---------|---------|---------|
| Element                                                                                  | EDS     |         | CHN-O   |         |
|                                                                                          | Tta-Dfp | Tab-Dfp | Tta-Dfp | Tab-Dfp |
| C                                                                                        | 81      | 90.9    | 82.5    | 89.5    |
| N                                                                                        | 19      | 9.1     | 17.5    | 10.5    |

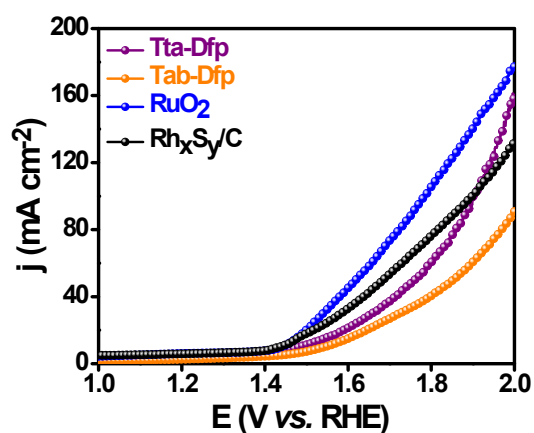

**Fig. S14A** LSV curves for the comparison of **Tta-Dfp** and **Tab-Dfp** with the benchmark CER electrocatalysts ( $\text{RuO}_2$  and  $\text{Rh}_x\text{S}_y/\text{C}$ )

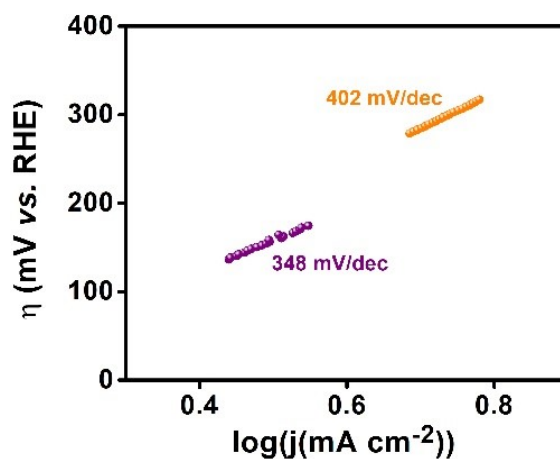

**Fig. S14B** Tafel slopes extracted from Fig. 2a for **Tta-Dfp** and **Tab-Dfp**.



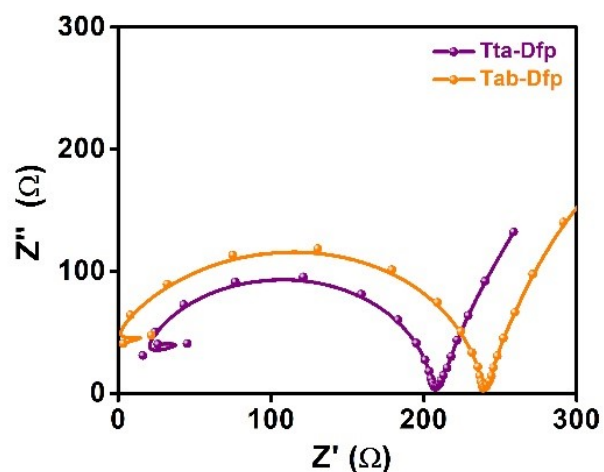

Fig. S15 Nyquist plot for Tta-Dfp and Tab-Dfp.

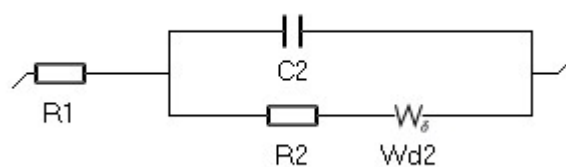

Fig. S16 Equivalent circuit obtained after fitting Nyquist plots of Tta-Dfp.

| <b>Table S3.</b> EIS analysis ( $R_{ct}$ and rate constant) of Tta-Dfp and Tab-Dfp during CER in 0.4 M HCl. |                                                                    |                                                                        |                                                                              |                                                                                      |
|-------------------------------------------------------------------------------------------------------------|--------------------------------------------------------------------|------------------------------------------------------------------------|------------------------------------------------------------------------------|--------------------------------------------------------------------------------------|
| <b>Catalyst</b>                                                                                             | <b><math>R_s</math> (<math>\Omega</math>, Solution resistance)</b> | <b><math>R_p</math> (<math>\Omega</math>, Polarization resistance)</b> | <b><math>R_{ct}</math> (<math>\Omega</math>, Charge-transfer resistance)</b> | <b>Rate constant, <math>k</math> (<math>\times 10^{-5} \text{ cm s}^{-1}</math>)</b> |
| <b>Tta-Dfp</b>                                                                                              | 13.70                                                              | 203.9                                                                  | 190.20                                                                       | 1.40                                                                                 |
| <b>Tab-Dfp</b>                                                                                              | 0.91                                                               | 235.91                                                                 | 235.00                                                                       | 1.13                                                                                 |

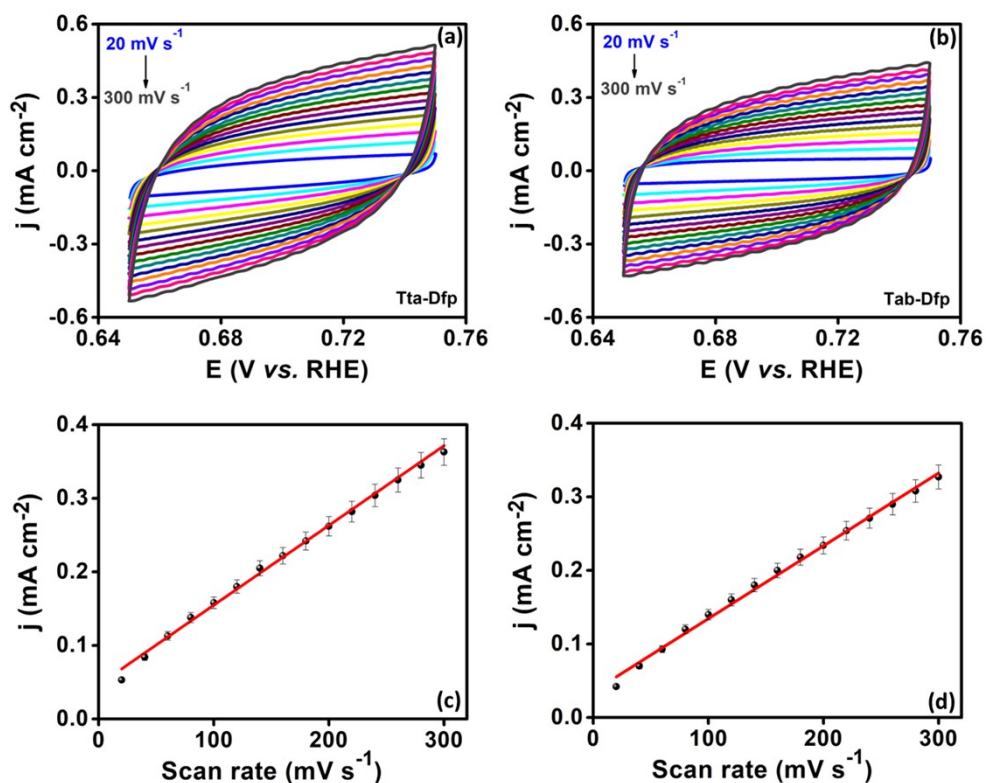

**Fig. S17** (a), (b) Cyclic voltammograms in the non-faradaic region for CER at different scan rates ( $20 \text{ mV s}^{-1}$  to  $300 \text{ mV s}^{-1}$ ) and (c), (d) corresponding current density vs. scan rate curves for the measurement of  $C_{dl}$ , ECSA and SSA.

| <b>Table S4.</b> $C_{dl}$ , ECSA and SSA of Tta-Dfp and Tab-Dfp in 0.4 M HCl. |                                                                          |                                        |                                                 |
|-------------------------------------------------------------------------------|--------------------------------------------------------------------------|----------------------------------------|-------------------------------------------------|
| <b>Catalyst</b>                                                               | <b><math>C_{dl}^*</math> (<math>\mu\text{F}</math>) at 0.7 V vs. RHE</b> | <b>ECSA (<math>\text{mm}^2</math>)</b> | <b>SSA (<math>\text{mm}^2/\text{mg}</math>)</b> |
| <b>Tta-Dfp</b>                                                                | 1.08                                                                     | 2.70                                   | 22.5                                            |
| <b>Tab-Dfp</b>                                                                | 0.989                                                                    | 2.47                                   | 20.5                                            |

### Quantification of chlorine gas: Iodometric titration

The amount of chlorine ( $\text{Cl}_2$ ) gas evolved was estimated by performing the chronoamperometry for 60 s at 1.5 V vs. RHE in 0.4 M HCl. Further, the obtained  $\text{Cl}_2$  was trapped by the immediate addition of an excess amount of potassium iodide (KI), and the solution was kept to attain equilibrium. The obtained amount was determined by performing iodometric titration versus 0.1 M  $\text{Na}_2\text{S}_2\text{O}_3$  and the following reactions will take place.

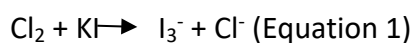

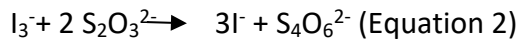

### Calculation

Total volume of 0.1 M Na<sub>2</sub>S<sub>2</sub>O<sub>3</sub> consumed during titration = 2.1 mL

Volume taken in the flask (0.4 M HCl and excess KI) = 30 mL

On applying the molarity equation:

$$M_1 * V_1 = M_2 * V_2$$

$$0.1 M * 2.1 mL = M_2 * 30 mL$$

$$M_2 = 0.007 M (I_3^-)$$

As can be seen in the stoichiometric equation two thio molecules are required for one (I<sub>3</sub><sup>-</sup>), therefore the concentration of thio would be equal to = 0.0035 M or mol/l.

Further, the amount of evolved chlorine was used to calculate the Faradaic efficiency as:

$$Q_{theo} = \frac{i * t}{nF}$$

$$Q_{theo} = \frac{22 mA.s}{2 * 96500 C/mol} = 1.1 * 10^{-7} mol$$

Upon converting the obtained value in mol/l considering the 30 ml of volume taken to evolve the chlorine: 0.0038 \* 10<sup>-3</sup> mol/l

$$F.E. (\%) = \frac{Q_{exp}}{Q_{theo}}$$

$$F.E. (\%) = \frac{0.0035 mol/l}{0.0038 mol l} = 92\%$$

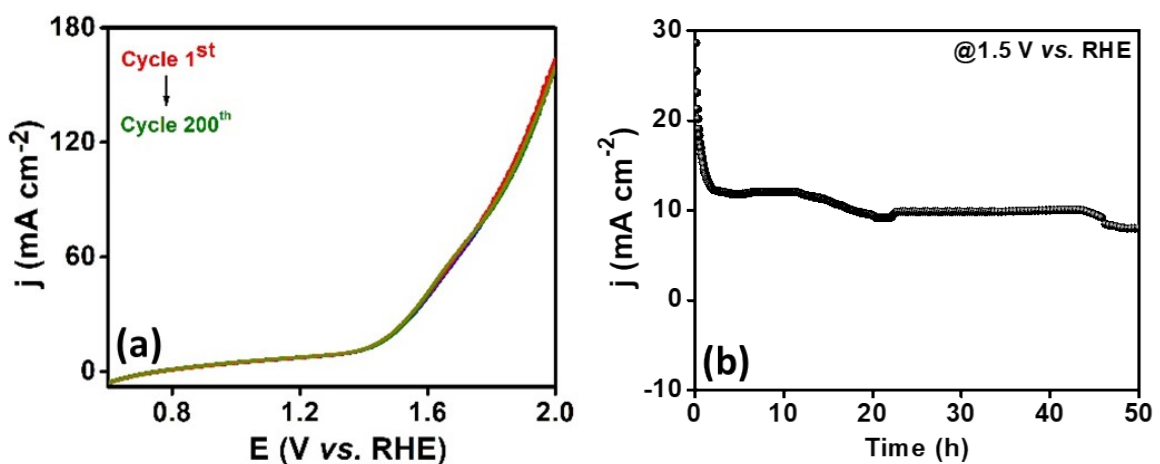

**Fig. S18** (a) LSV curves recorded CER of **Tta-Dfp** for 200 cycles at a scan rate of  $50 \text{ mV s}^{-1}$  in 0.4 HCl and (b) chronoamperometry curve in 0.4 HCl at 1.5 V vs. RHE for 50 h.

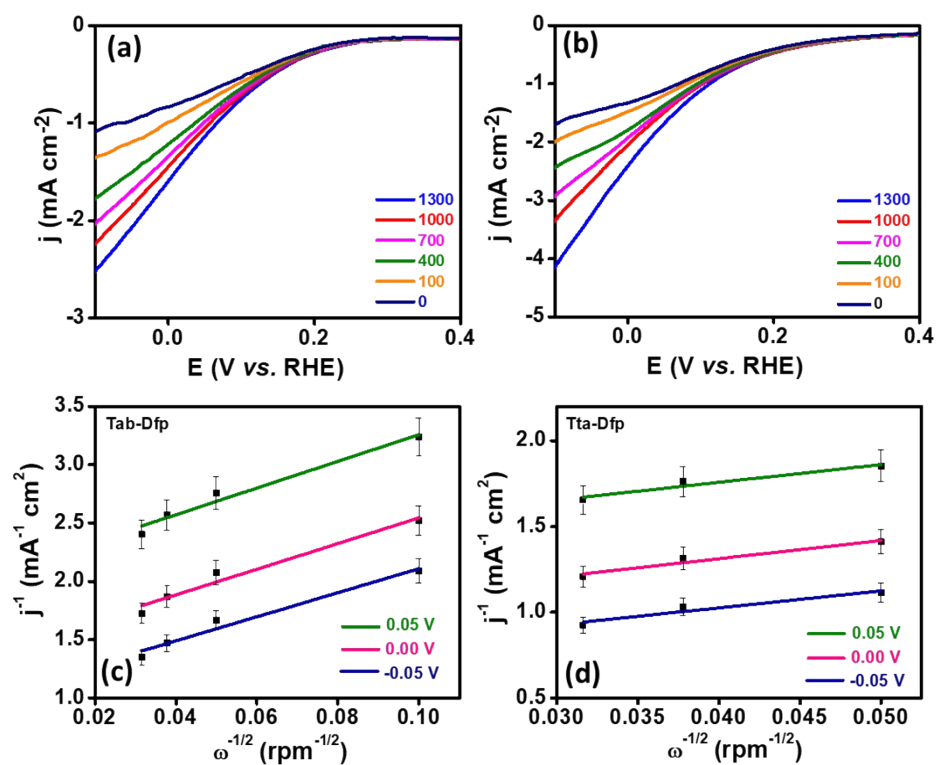

**Fig. S19A** RDE polarization curve (a) **Tab-Dfp**, (b) **Tta-Dfp** and K-L plots derived for (c) **Tab-Dfp**, (d) **Tta-Dfp** catalysts from respective RDE polarization curves at various rotation rates at different potentials (0.05 V, 0.00 V and -0.05 V vs. RHE).

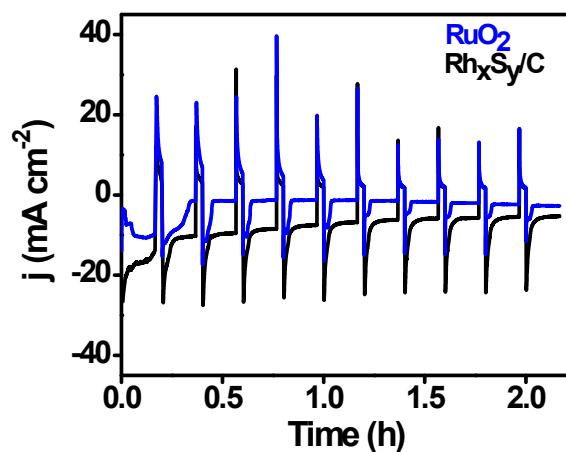

**Fig. S19B** Chronoamperometry analysis performed for 10 minutes of operation @0 V and 2 minutes of shutdown (i.e. system off) for RuO<sub>2</sub> and Rh<sub>x</sub>S<sub>y</sub>/C.

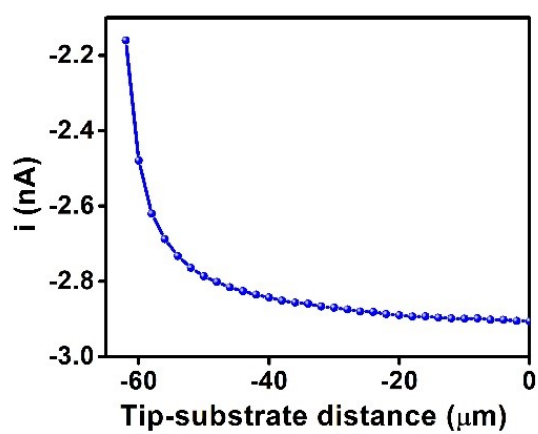

**Fig. S20** Approach curve ( $I$  vs. tip substrate distance) for tip positioning.

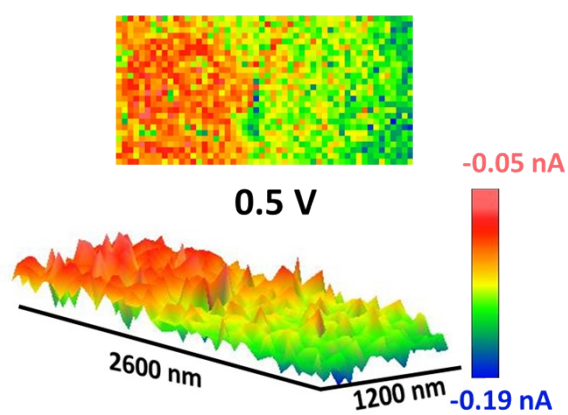

**Fig. S21** 2D SECM images of **Tta-Dfp** and **Tab-Dfp** catalyst spot at a reduction potential of 0.5 vs. RHE

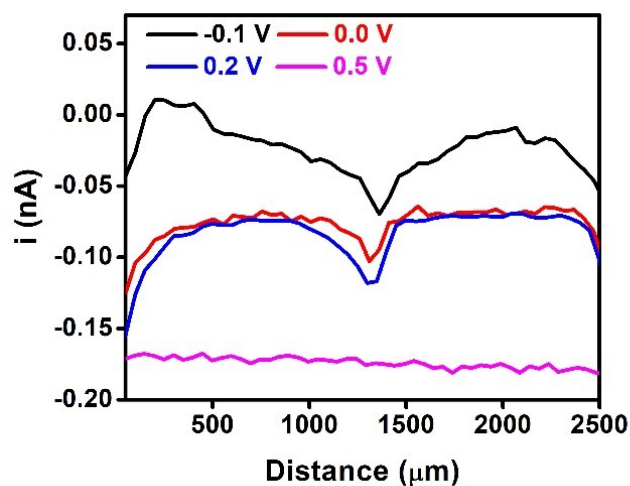

**Fig. S22** RC-SECM x-line scan of the catalyst's spots polarized at different potentials (-0.1, 0.0, 0.2 and 0.5 V vs. RHE).

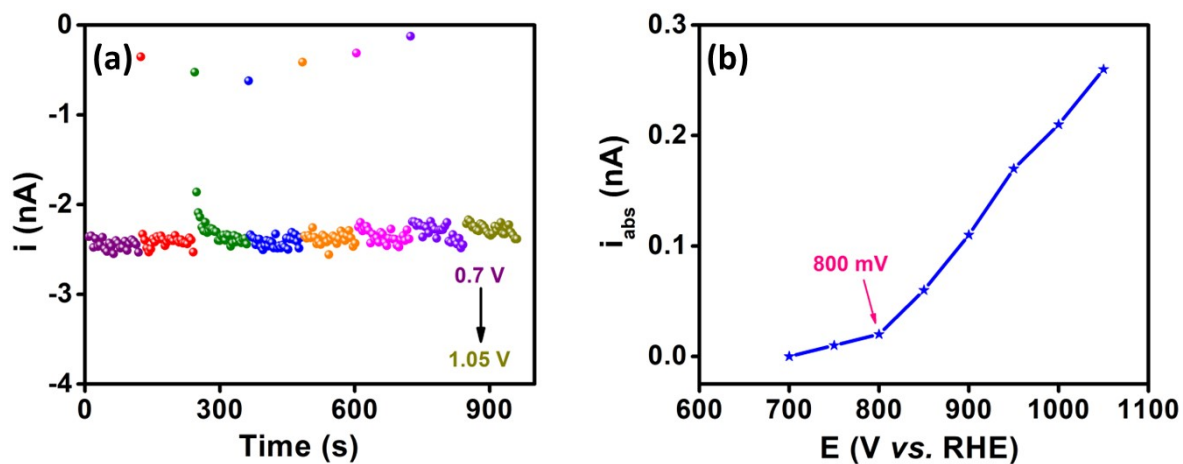

**Fig. S23** (a) Sequential chronoamperometric curves at Pt tip in 0.4 M HCl in the potential range of 0.15 V to 0.50 V vs. Ag/AgCl/3 M KCl with an interval of 50 mV and (b) Absolute current difference vs. applied potential obtained from Figure S23a.

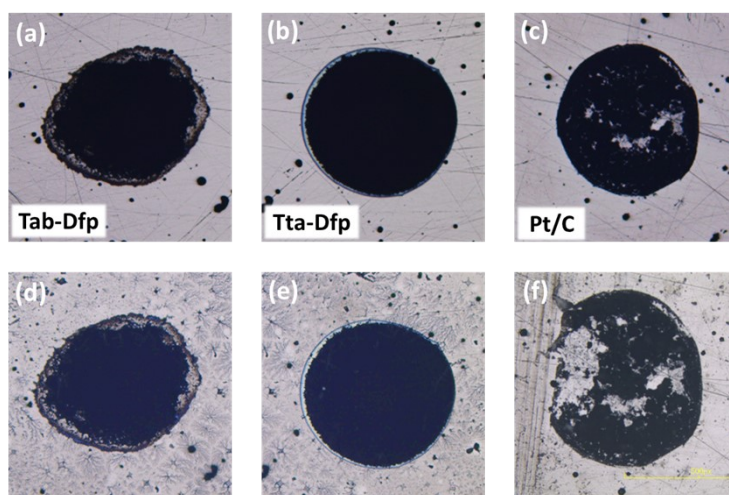

**Fig. S24** Optical microscopic images before SECM analysis (a) **Tab-Dfp**, (b) **Tta-Dfp**, (c) Pt/C (20%) and after SECM analysis (a) **Tab-Dfp**, (b) **Tta-Dfp**, (c) Pt/C (20%).

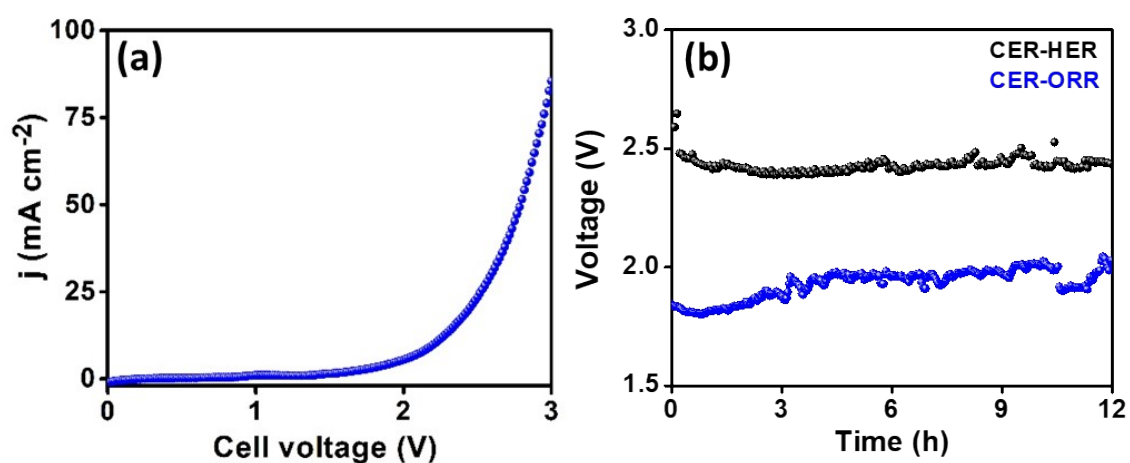

**Fig. S25** (a) LSV under full cell conditions (CER-ODC) with **Tta-Dfp** employed at both anode and cathode, (b) chronopotentiometry curves for CER-HER and CER-ODC cells at 10 mA cm<sup>-2</sup> for 12 h each.

## References

1. K. C. Ranjeesh, S. Kaur, A. K. Mohammed, S. Gaber, D. Gupta, K. Badawy, M. Aslam, N. Singh, T. Skorjanc, M. Finšgar, J. Raya, T. C. Nagaiah and D. Shetty, *Advanced Energy Materials*, **n/a**, 2303068.
